1 **Salicylic acid perturbs small RNA-gibberellin regulatory network**  
2 **in immune response of potato to *Potato virus Y* infection and**  
3 **renders plants tolerant to the pathogen**

4

5 Maja Križnik<sup>1,2</sup>, Marko Petek<sup>1</sup>, David Dobnik<sup>1</sup>, Živa Ramšak<sup>1</sup>, Špela Baebler<sup>1</sup>, Stephan  
6 Pollmann<sup>3</sup>, Jan Kreuze<sup>4</sup>, Jana Žel<sup>1</sup>, Kristina Gruden<sup>1</sup>

7

8 <sup>1</sup>Department of Biotechnology and Systems Biology, National Institute of Biology, Ljubljana  
9 1000, Slovenia

10 <sup>2</sup>Jožef Stefan International Postgraduate School, Ljubljana 1000, Slovenia

11 <sup>3</sup>Centro de Biotecnología y Genómica de Plantas, Universidad Politécnica de Madrid (UPM) -  
12 Instituto Nacional de Investigación y Tecnología Agraria y Alimentaria (INIA), Campus de  
13 Montegancedo UPM, Madrid 28223, Spain.

14 <sup>4</sup>Global Program of Integrated Crop and Systems Research, International Potato Center (CIP),  
15 Lima 12, Peru

16

17

18 **Abstract**

19 *Potato virus Y* is the most economically important potato viral pathogen. We aimed at  
20 unraveling the roles of small RNAs (sRNAs) in the complex immune signaling network  
21 controlling the establishment of tolerant response of potato cv. Désirée to the virus. We  
22 constructed a sRNA regulatory network connecting sRNAs and their targets to link sRNA  
23 level responses to physiological processes. We discovered an interesting novel sRNAs-  
24 gibberellin regulatory circuit being activated as early as 3 days post inoculation, before viral  
25 multiplication can be detected. Increased levels of miR167 and phasiRNA931 were reflected  
26 in decreased levels of transcripts involved in gibberellin biosynthesis. Moreover, decreased  
27 concentration of gibberellin confirmed this regulation. The functional relation between lower  
28 activity of gibberellin signaling and reduced disease severity was previously confirmed in  
29 Arabidopsis-virus interaction using knockout mutants. We additionally showed that this  
30 regulation is salicylic acid dependent as the response of sRNA network was attenuated in  
31 salicylic acid-depleted transgenic counterpart NahG-Désirée expressing severe disease

32 symptoms. Besides downregulation of gibberellin signaling, regulation of several other parts  
33 of sRNA network in tolerant Désirée revealed similarities to responses observed in  
34 mutualistic symbiotic interactions. The intertwining of different regulatory networks revealed  
35 shows how developmental signaling, symptomology and stress signaling are balanced.

36

## 37 **Introduction**

38 Potato (*Solanum tuberosum* L.) is the world's most important non-grain staple crop. Viruses  
39 pose a serious threat to potato production, not only because of the effects caused by the  
40 primary infection, but also because potato is propagated vegetatively so that viruses are  
41 transmitted through the tubers and accumulate over time (Solomon-Blackburn and Barker,  
42 2001). The most devastating potato virus is *Potato virus Y* (PVY) (Karasev and Gray, 2013).  
43 PVY is a member of the Potyviridae family and comprises of many diverse strains.  
44 Worldwide, the most harmful strain is PVY<sup>NTN</sup> which has been responsible for huge decreases  
45 in quality and quantity of potato tuber production (Scholthof et al., 2011). One of the most  
46 widely grown potato cultivars is cv. Désirée, which is tolerant to PVY<sup>NTN</sup>, meaning that the  
47 virus replicates and spreads systemically, however, symptoms of the disease are reduced or  
48 not visible at all (Ravnikar, 2013; Baebler et al., 2011). Tolerance may have an advantage  
49 over resistance for crop protection because it does not actively prevent virus infection and/or  
50 replication, therefore there is little evolutionary pressure for PVY to mutate and to evolve into  
51 more aggressive strains (Bosch et al., 2006). Hence, the tolerant phenotype is likely to be  
52 more durable than resistance (Wilson, 2014). Until now, studies on Désirée-PVY<sup>NTN</sup>  
53 interactions have focused on the detection of changes in the plant transcriptome and  
54 proteome, particularly those related to plant hormonal signaling (Baebler et al., 2011; Stare et  
55 al., 2015). Salicylic acid (SA) was found to be the crucial component for attenuation of the  
56 disease symptoms (Baebler et al., 2011). However, understanding of the mechanisms that  
57 underlie tolerance response to PVY<sup>NTN</sup> is still incomplete.

58

59 RNA silencing is a basal antiviral system in plants, where DICER-like (DCL) proteins cleave  
60 viral dsRNA structures, giving rise to virus-derived small interfering RNAs (vsiRNAs), which  
61 are then incorporated into Argonaute (AGO) protein(s) to guide viral RNA degradation  
62 (Baulcombe, 2004). To counter this host defense mechanism, viruses have evolved viral  
63 suppressors of RNA silencing (Csorba et al., 2015). Helper component-proteinase (HCPro) of

64 potyviruses suppresses silencing by sequestering small RNAs (sRNAs) and AGO1 and thus  
65 counteracts the degradation of viral RNA (Ivanov et al., 2016). Another level of plant antiviral  
66 defense is mediated by resistance genes, leading towards effector triggered immunity, often  
67 resulting in hypersensitive response and programmed cell death (Zvereva and Pooggin, 2012;  
68 Coll et al., 2011). The cv. Désirée carries the *Ny* gene conferring resistance against strain  
69 PVY<sup>O</sup>, but lacks resistance genes against the PVY<sup>NTN</sup> strain (Singh et al., 2008) and thus does  
70 not respond by triggering an efficient effector triggered immunity.

71

72 Recent findings revealed that endogenous RNA silencing mediated by microRNAs (miRNAs)  
73 and small interfering RNAs (siRNAs) could play important roles in plant immunity (Seo et  
74 al., 2013; Navarro et al., 2005; Li et al., 2011; Weiberg and Jin, 2015). These 18-24-nt long  
75 non-coding sRNAs are able to negatively regulate gene expression by binding to the specific  
76 mRNA targets which leads to either promoting their degradation, inhibiting their translation,  
77 or suppressing transcription by epigenetic modification (Baulcombe, 2004; Chen et al., 2011;  
78 Wu et al., 2010; Chellappan et al., 2010). The endogenous RNA silencing can be amplified by  
79 the production of secondary phased siRNAs (phasiRNAs), triggered by 22-nt  
80 miRNAs/siRNAs (Chen et al., 2010; Cuperus et al., 2010). phasiRNAs are generated in phase  
81 relative to positions of the miRNA cleavage site, can be produced from both coding non-  
82 coding transcript (*PHAS* loci) and are able to target transcripts not only in *trans* but also their  
83 *PHAS* loci of origin in *cis* and thus additionally contribute to the autoregulation (Borges and  
84 Martienssen, 2015). miRNAs have been associated with defense responses against several  
85 pathogens (Peláez and Sanchez, 2013; Ruiz-Ferrer and Voinnet, 2009). Arabidopsis miR393  
86 was the first plant miRNA reported to play a key role in antibacterial immunity by repressing  
87 auxin signaling (Navarro et al., 2005). Recently, several studies have uncovered the miRNA-  
88 mediated silencing of receptor gene (*R*-gene) transcripts. Infection by pathogens e.g. viruses  
89 or bacteria, relieves the silencing, leading to the accumulation of *R* proteins and activation of  
90 immune responses (Li et al., 2011; Shivaprasad et al., 2012; Park and Shin, 2015).

91

92 This growing body of evidence suggests that sRNAs are integral components of plant  
93 immunity. However, none of the studies performed so far investigated the sRNA regulatory  
94 network in potato-virus interaction at the systems level linking it to transcriptional regulation.  
95 The aim of this study was to investigate sRNAs' role in establishment of the tolerant response  
96 of potato to PVY<sup>NTN</sup>, hence we have studied response in the early stage of viral infection,

97 before the viral multiplication can be detected. Employing high-throughput sequencing  
98 technology, we characterized and compared the sRNA expression patterns between PVY-  
99 infected and healthy tolerant potato plants. In addition, this information was linked with  
100 expression profiles of their target transcripts identified *in silico* and by Degradome-Seq and  
101 used for sRNA regulatory network construction. Besides the already described regulation of  
102 *R*-gene transcripts we have discovered a previously undescribed connection between sRNAs  
103 and gibberellin (GA) biosynthesis representing an important link between immune and  
104 developmental signaling pathways. This link was confirmed by hormonal content  
105 measurements. Additionally, we analyzed sRNA regulatory network in transgenic NahG-  
106 Désirée. We showed that response of the discovered sRNA network is attenuated when SA is  
107 deficient, indicating a mechanism through which SA is regulating disease tolerance in potato.

108

## 109 **Results**

### 110 **Novel endogenous sRNAs identified in potato leaves**

111 We identified 245 different previously described miRNAs (including 38 miRNA variants;  
112 isomiRs), belonging to 95 miRNA families in control and PVY<sup>NTN</sup>-infected leaves of cv.  
113 Désirée using sRNA-Seq (**Supplemental Figure 1, Supplemental Dataset 1**). In addition,  
114 141 novel miRNAs were detected, of those 12 were coded by multiple *MIR* loci. Novel  
115 miRNA sequences were assigned to 123 novel miRNA families (**Supplemental Dataset 1**  
116 **and 2**).

117

118 When assessing the miRNA regulatory network, the amplification of silencing through  
119 phasiRNA biogenesis was also considered. In total, more than 4000 *PHAS* loci were  
120 predicted, coding for 2558 phasiRNAs. 124 loci were located on protein-coding regions of  
121 genes, with the majority encoding NBS-LRRs (nucleotide binding site-leucine rich repeat  
122 proteins) and LRR-RLKs (leucine rich repeat-receptor-like kinases) (**Supplemental Dataset 3**  
123 **and 4**). Interestingly, several novel *PHAS* loci were discovered in coding regions of genes  
124 associated with stress signaling, such as *HSP70*, superoxide dismutase and auxin signaling F-  
125 box proteins (see **Supplemental Table 1** for the full list of genes used in this study together  
126 with their descriptions and corresponding IDs). We also confirmed that *StAGO1* is a *PHAS*  
127 locus (**Supplemental Dataset 3**), as previously described in Arabidopsis (Axtell et al., 2006).

128

129 We further compared miRNA expression profiles of PVY<sup>NTN</sup>-infected versus mock inoculated  
130 leaves in early stages of virus infection (3 dpi, 1 day before detectable viral multiplication;  
131 (Baebler et al., 2011; Stare et al., 2015)). In total, 57 unique miRNAs were found to be  
132 significantly differentially expressed in early stages of PVY<sup>NTN</sup> infection (3 dpi) of Désirée  
133 plants. Virus infection predominantly caused an increase in miRNAs levels (**Supplemental**  
134 **Dataset 1**). Additionally, we identified 35 phasiRNAs as differentially regulated 3 dpi, mainly  
135 originating from noncoding *PHAS* and *NBS-LRR* loci (**Supplemental Dataset 4**). To validate  
136 the obtained sRNA-Seq results, abundance of six differentially expressed miRNAs was  
137 analyzed by stem-loop RT-qPCR. As shown in (**Supplemental Figure 2**, all sRNA-Seq  
138 differential expression results were confirmed.

139

140 In previous studies, a plethora of potato miRNA/phasiRNAs have been shown to be  
141 differentially expressed following pathogen infection. However, the biological relevance of  
142 these differences remains largely unknown. To translate the data obtained on sRNA level into  
143 changes in physiological processes, we performed *in silico* sRNA target prediction, both at the  
144 levels of translational inhibition and target cleavage (**Supplemental Dataset 5**). Additionally,  
145 the predictions of target cleavage were experimentally validated by Degradome-Seq  
146 (**Supplemental Dataset 6**). Based on this information we constructed a potato sRNA  
147 regulatory network connecting miRNAs with phasiRNAs and their targets (**Supplemental**  
148 **Online File 1 and 2**). This revealed several already known and many novel connections  
149 linking sRNA regulation to the plant immune signaling (see example in **Supplemental**  
150 **Figure 3; Supplemental Dataset 5 and 6**). Several miRNA-mRNA pairs conserved across  
151 plant species, such as miR156-*SPL11*, miR160-*ARF10*, miR172-*AP2* or miR396-*GRF5*  
152 (Curaba et al., 2014), were confirmed also in our system (**Supplemental Dataset 5 and 6**).  
153 Our data also showed the miR393-mediated cleavage of transcripts encoding members of  
154 *TIR/AFB* gene family, receptors implicated in the control of auxin signaling (**Figure 1**) (Si-  
155 Ammour et al., 2011). We also discovered that these transcripts were targets of several *TIR1*-  
156 derived phasiRNAs (phasiTIRs) (**Figure 1, Supplemental Dataset 5 and 6**) (Si-Ammour et  
157 al., 2011). Moreover, we identified that the miR393- and phasiTIR-network is also targeting  
158 downstream transcription factor StARF1 and other phytohormone signaling pathways, such as  
159 transcripts involved in ethylene signaling (*StERF2a*, *StAP2*, and *StEIN4*), in jasmonate  
160 signaling (*StLOX1* and *StOPRI*) and in brassinosteroid biosynthesis (*StDWF4*) (**Figure 1,**

161 **Supplemental Dataset 5 and 6)** indicating much larger complexity of sRNA network  
 162 regulation as so far predicted.

163

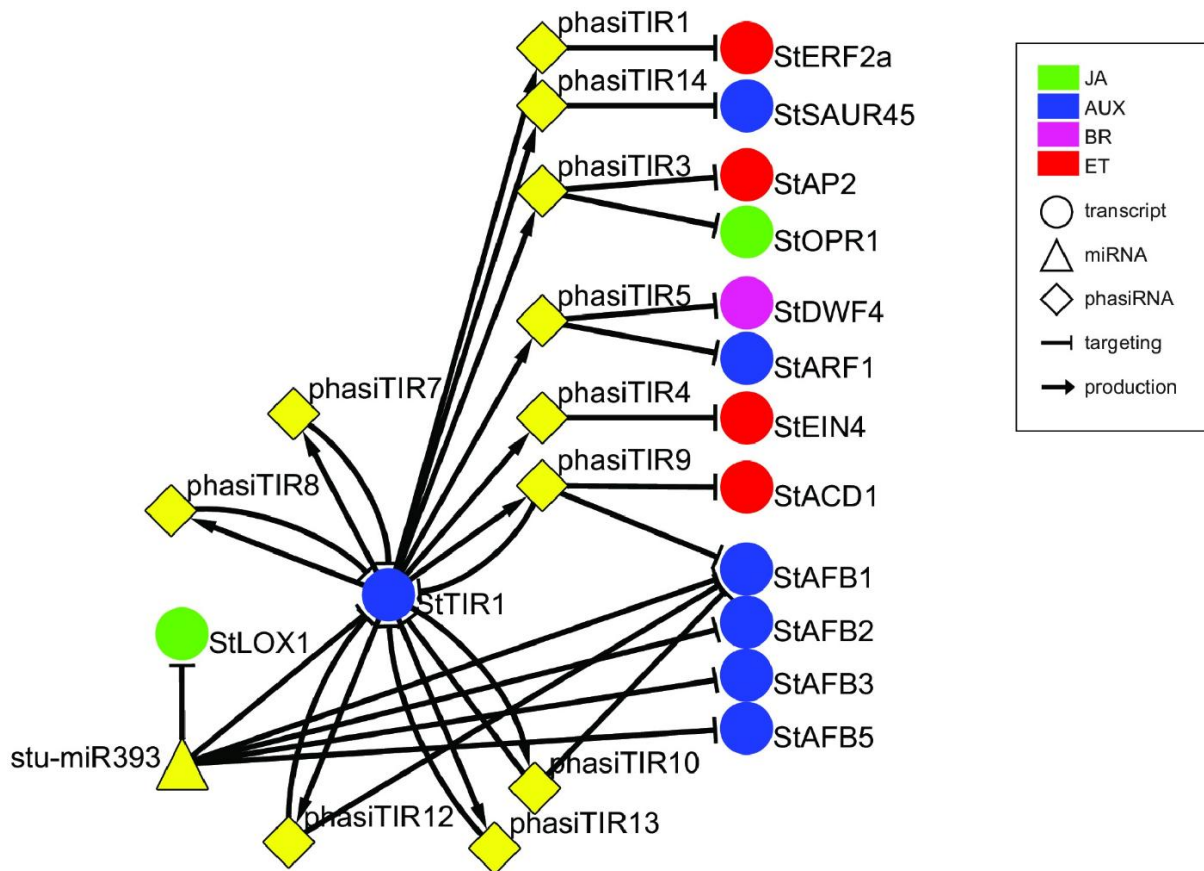

164

165 **Figure 1. miR393-mediated cleavage of StTIR1 leads to production of phasiTIRs targeting diverse**  
 166 **phytohormone signaling components.** Node shapes represent classes of sRNAs (triangle – miRNA; diamond –  
 167 phasiRNA) or transcripts (circle). Node colors indicate components related to different hormone signaling  
 168 pathways: green – jasmonic acid (JA); blue – auxin (AUX); magenta – brassinosteroid (BR); red – ethylene  
 169 (ET). Arrows connect sRNAs and targets (blunt-end arrow) or *PHAS* loci and producing phasiRNAs (regular  
 170 arrow). Node stu-miR393 represents miR393-5p and miR393-5p.1 and node StAFB1 represents StAFB1.1,  
 171 StAFB1.2, and StAFB1.3. For details of the target transcripts/genes see **Supplemental Table 1**. StTIR1 –  
 172 Transport inhibitor response 1, StLOX1 – Lipoxygenase 1, StERF2a – Ethylene responsive transcription  
 173 factor 2a, StSAUR45 – Small auxin upregulated RNA 45, StAP2 – APETALA2, StOPR1 – 12-  
 174 oxophytodienoate (OPDA) reductase, StDWF4 – Dwarf4, StARF1 – Auxin response factor 1, StEIN4 –  
 175 Ethylene insensitive 4, StACD1 – 1-aminocyclopropane-1-carboxylic acid deaminase 1, StAFB1/2/3/5 –  
 176 Auxin F-box 1/2/3/5.

177

178 We also found that the vast majority of differentially expressed miRNAs and phasiRNAs  
 179 targets encode defense related proteins such as pathogenesis-related (PR) proteins and  
 180 proteins involved in the biosynthesis of secondary metabolites, transcription factors belonging  
 181 to AP2/ERF, bHLH, MYB and GRAS family proteins, putative immune receptors (NBS-  
 182 LRRs, LRR-RLKs) as well as proteins involved in biosynthesis and signaling of different  
 183 phytohormones (**Figure 2A**).

184

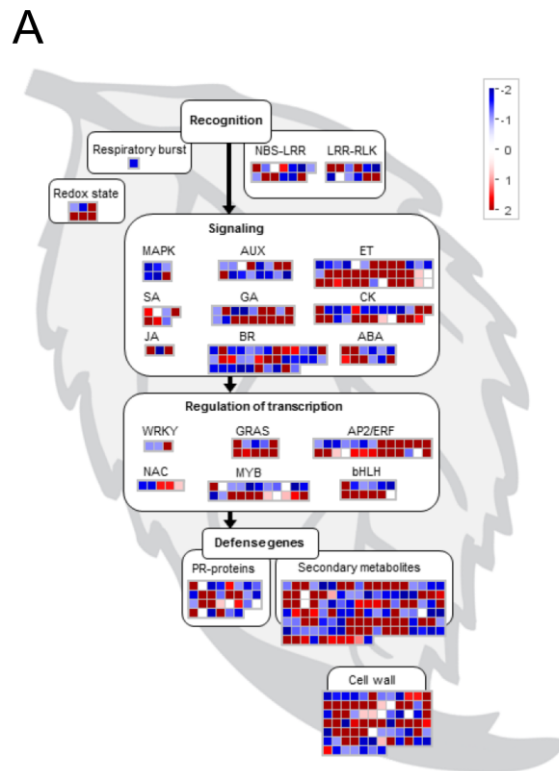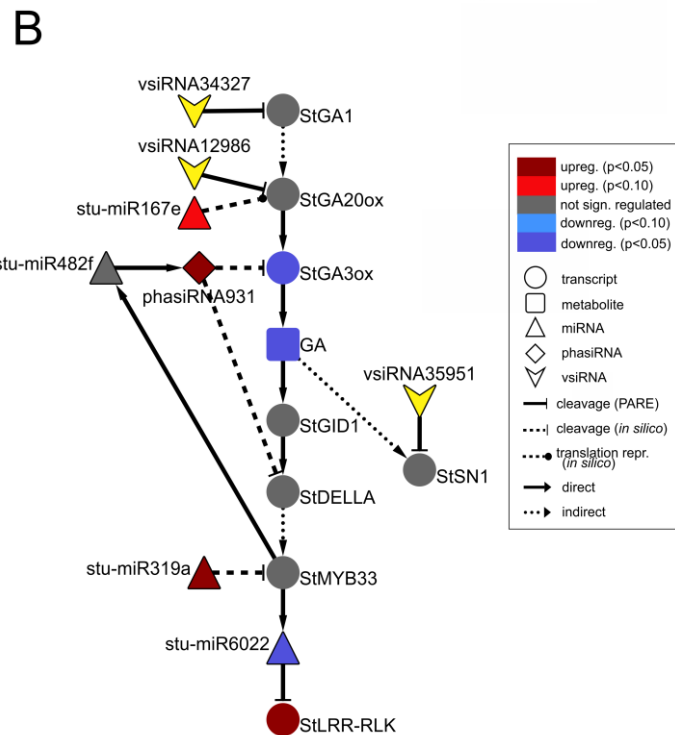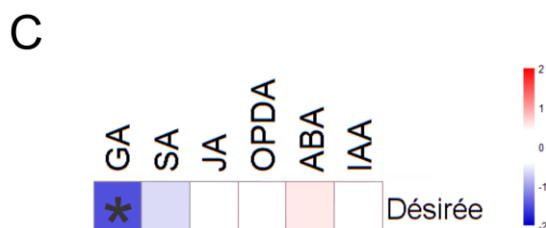

185

186 **Figure 2. PVY induced changes in sRNA regulatory network are controlling multiple immune and**  
187 **gibberellin signaling components in Désirée at the onset of viral multiplication.** (A) Visualization of  
188 differentially expressed miRNAs/phasiRNAs in PVY<sup>NTN</sup>-infected Désirée according to the function of their  
189 targets. Each square represents log<sub>2</sub> ratios of expression between PVY<sup>NTN</sup>- and mock-inoculated plants (red –  
190 upregulated; blue – downregulated). MapMan ontology bins: respiratory burst (20.1.1), redox state (21.6),  
191 MAPK (30.6), SA (17.8), JA (17.7), AUX (17.2), GA (17.6), BR (17.3), ET (17.5), CK (17.4), ABA (17.1),  
192 WRKY (27.3.32), NAC (27.3.27), GRAS (27.3.21), MYB (27.3.25), AP2/ERF (27.3.3), bHLH (27.3.6), PR-  
193 proteins (20.1.7), secondary metabolites (16), cell wall (10). The NBS-LRR and LRR-RLK bins were custom  
194 constructed for this study, based on their harboring domains (obtained from PFAM database; (Finn et al., 2016)).  
195 These bins represent differentially expressed miRNAs/phasiRNAs targeting NBS-LRRs or LRR-RLKs. NBS-  
196 LRR – nucleotide binding site-leucine-rich repeat protein, LRR-RLK – leucine-rich repeat receptor-like kinase,  
197 MAPK – mitogen activated protein kinase, SA – salicylic acid, JA – jasmonic acid, AUX – auxin, GA –  
198 gibberellin, BR – brassinosteroid, ET – ethylene, CK – cytokinin, ABA – abscisic acid, PR – pathogenesis-  
199 related. (B) Network of differentially expressed endogenous sRNAs and vsRNAs targeting mRNAs of GA  
200 biosynthesis and signaling pathways in Désirée 3 days post PVY<sup>NTN</sup> inoculation. Node shape represent classes of  
201 sRNAs (triangle – miRNA; diamond – phasiRNA; arrowhead – vsRNA), transcripts (circle) or metabolites  
202 (rectangle). Statistical significances of expression differences (p-values) and direction of expression change are  
203 represented by the node colors (see the legend). Arrows indicate type of interaction (solid-line normal arrow –  
204 direct interaction; dashed-line normal arrow – indirect interaction; blunt-end solid arrow – cleavage observed by  
205 Degradome-Seq, blunt-end dashed-line arrow – *in silico* predicted cleavage (or translational repression as  
206 proposed by Rogers and Chen (Rogers and Chen, 2013), dashed-line oval arrow – *in silico* predicted  
207 translational repression). Node stu-miR319a represents stu-miR319a-3p, stu-miR319a-3p.2, stu-miR319a-3p.4  
208 and stu-miR319b-3p. Node StGA20ox represents StGA20ox, StGA20ox1, StGA20ox3 and StGA20ox4. For  
209 details of the target transcripts/genes see **Supplemental Table 1**. Stu-miR167e – stu-miR167e-3p; stu-miR482f  
210 – miR482f-3p; stu-miR6022 – miR6022-3p; StGA1 – GA REQUIRING 1 (ent-copalyl diphosphate synthase);  
211 StGA20ox – GA20-oxidase; StGA3ox – GA3-oxidase; StGID1C – GA receptor - GA INSENSITIVE  
212 DWARF1C hydrolase; StSN1 – Snakin-1; StDELLA – DELLA protein; StLRR-RLK – leucine-rich repeat  
213 receptor-like protein kinase. (C) Changes in concentrations of a set of plants hormones in Désirée 3 days after  
214 PVY<sup>NTN</sup> infection. sRNA-mediated repression of GA biosynthesis was confirmed by reduced GA<sub>3</sub> levels in  
215 PVY-infected Désirée plants. Colors present as log<sub>2</sub> ratios of mean concentrations between PVY<sup>NTN</sup>- and mock-  
216 inoculated plants (n=4; red – increased, blue – decreased level). \* - indicate statistically significant values  
217 (ANOVA; p < 0.05). SA – salicylic acid, JA – jasmonic acid, OPDA –12-oxophytodienoic acid, ABA – abscisic  
218 acid, IAA – indole-3-acetic acid.

219

## 220 **sRNA regulatory network reponse in tolerant interaction resemble responses in** 221 **mutualistic symbiosis**

222 Analysis of the differentially expressed miRNAs and phasiRNAs together with the levels of  
223 the target transcripts (data published in (Stare et al., 2015)) revealed the presence of many  
224 known, as well as novel, regulatory cascades involving *NBS-LRRs*. Several *NBS-LRRs* were  
225 predicted to be targeted by miR482, miR6024 and miR6027 family members (**Supplemental**  
226 **Dataset 5 and 6**). Moreover, *NBS-LRRs* are regulated also by phasiRNAs, where most  
227 phasiRNAs have multiple *NBS-LRR* targets (**Supplemental Figure 4, Supplemental Dataset**  
228 **5 and 6**) due to the shared conserved P-loop or Walker A motif (Shivaprasad et al., 2012). In  
229 all of the previous studies miR482 family members were downregulated following pathogen  
230 infection (Ouyang et al., 2014; Shivaprasad et al., 2012; Yang et al., 2015). In our study,  
231 however, the one regulated member of the miR482 family (miR482e) targeting *NBS-LRR*  
232 transcripts was upregulated following PVY<sup>NTN</sup> infection (**Supplemental Dataset 1**), similarly



233 as observed in establishment of mutualistic symbiosis in soybean roots (Li et al., 2010).  
234 Moreover, several miRNAs that were upregulated in response to PVY<sup>NTN</sup> in cv. Désirée, such  
235 as miR164, miR167, miR169, miR171, miR319, miR390, miR393, miR397 and miR398 have  
236 also been reported to regulate nodulation and arbuscular mycorrhizal symbiosis in different  
237 legume species (**Supplemental Dataset 1**; (Mao et al., 2013; Yan et al., 2015; Lelandais-  
238 Brière et al., 2009; De Luis et al., 2012; Devers et al., 2011). In addition to NBS-LRR  
239 proteins, LRR-RLKs are also important mediators of immune as well as important triggers of  
240 mutualistic symbiosis signaling cascades (Hohmann et al., 2017; Antolin-Llovera et al.,  
241 2014). We have identified a novel miRNA-LRR-RLK interaction in which miR6022 levels  
242 decrease in response to PVY<sup>NTN</sup> infection in cv. Désirée, which is further linked to  
243 upregulation of its predicted target genes encoding LRR-RLKs (**Supplemental Figure 4A**).

244

#### 245 **Several PVY<sup>NTN</sup>- derived siRNAs trigger degradation of host transcripts**

246 The primary plant defense mechanism against invading viruses is RNA silencing involving  
247 the production of vsiRNAs. The population of vsiRNAs detected in the infected samples  
248 consisted of more than 46 000 unique sequences of 20-24 nt in length (**Supplemental Dataset**  
249 **7**). In order to take into account the unlikely possibility that PVY<sup>NTN</sup> produces its own  
250 miRNAs, we first ran the miRNA prediction pipeline on vsiRNAs and the viral genome.  
251 However, we found no sequence that would fulfill the criteria for a viral miRNA.  
252 Subsequently, we searched for potential host transcripts targeted by vsiRNAs in our  
253 experimentally validated target degradation dataset (**Supplemental Dataset 8**). We found that  
254 vsiRNAs are indeed able to target multiple potato transcripts, among them mRNAs coding for  
255 immune receptor proteins, various transcription factors and proteins involved in hormonal  
256 signaling pathways (**Supplemental Dataset 8**). For example, several vsiRNAs were detected  
257 with the confirmed ability to guide the cleavage of transcripts involved in auxin signaling,  
258 transcripts encoding IAA-amino acid hydrolases (StILR1 and StIAR3), Aux/IAA  
259 transcriptional repressors (StIAAs) and the transcription factor StARF2.

260

#### 261 **sRNA-mediated downregulation of GA biosynthesis genes is reflected in lower GA<sub>3</sub>** 262 **levels**

263 Interestingly, we found that GA biosynthesis and downstream signaling are targeted by a  
264 sRNA-mediated regulatory network and that the changes in sRNA levels following PVY<sup>NTN</sup>  
265 infection are reflected also in the changes of their target transcripts levels (**Figure 2B**,

266 **Supplemental Dataset 5**). GA20-oxidase (GA20ox) and GA3-oxidase (GA3ox) are enzymes  
267 that catalyze the last steps in the formation of bioactive GAs (Yamaguchi, 2008). We found  
268 that in Désirée plants the *StGA20ox* transcript is regulated by miR167e (**Figure 2B**). An  
269 additional layer of GA biosynthesis regulation is represented by increased production of  
270 phasiRNA931, which promotes cleavage of the *StGA3ox* transcript. The transcriptomics  
271 results support these interactions as the targeted transcripts are significantly downregulated in  
272 Désirée upon PVY<sup>NTN</sup> infection (**Figure 2B, Supplemental Dataset 5**). Additionally,  
273 vsRNAs were found to target transcripts encoding two enzymes involved in GA biosynthesis  
274 *StGA1* and *StGA20ox* (**Figure 2B, Supplemental Dataset 8**). One also has to note that all of  
275 the miRNAs/phasiRNAs discovered to be involved in sRNA-GA biosynthesis regulation have  
276 so far not been identified in Arabidopsis and among them only miR167e was also discovered  
277 in tomato (Griffiths-Jones et al., 2006; Zhang et al., 2014).

278 Downstream GA signaling is also targeted by sRNAs in the potato-PVY interaction on  
279 multiple levels. The four miR319 family members were predicted to cleave the transcript  
280 encoding StMYB33, a GA-induced MYB-like transcription (GAMYB) factor orthologue  
281 (Millar and Gubler, 2005), whereas phasiRNA931 targets a potato orthologue of a DELLA  
282 protein, a GA-signaling repressor (**Figure 2B**).

283  
284 Such interconnectedness between plant defense related miRNA/phasiRNA network and GA  
285 biosynthesis/signaling has not been previously identified and may represent a link between  
286 defensive and developmental signaling. Thus, we decided to functionally evaluate these  
287 results by measuring the concentrations of a set of plant hormones. As predicted by the  
288 sRNA-target transcript analyses, we detected a reduced level of GA<sub>3</sub> in PVY<sup>NTN</sup> infected  
289 Désirée plants (**Figure 2C**). The levels of SA, jasmonic acid (JA), the JA precursor 12-  
290 oxophytodienoic acid (OPDA), abscisic acid (ABA) and indole-3-acetic acid (IAA) remained  
291 unchanged at 3 dpi (**Figure 2C, Supplemental Dataset 9**). To inspect if GA deficiency has  
292 any impact on plant growth, plants height was monitored till 21 dpi. No differences were  
293 observed between all four studied groups of plants.

294

## 295 **The miRNA regulatory network and transcriptional regulation are tightly** 296 **interconnected**

297 Given the critical role of miRNAs in gene regulation, *cis*-regulatory elements of differentially  
298 expressed *MIR* genes involved in *R*-gene regulation and GA signaling were investigated.

299 Interestingly, GAMYB binding sites were detected in the promoters of the *MIR6022* and  
300 *MIR482f* genes (**Supplemental Dataset 10**). Moreover, these genes harbor WRKY8/28/48  
301 binding sites, while *MIR319a* harbors a general WRKY binding W-box regulatory element.  
302 Additionally, *cis*-acting elements involved in SA and JA responsiveness were identified in the  
303 promoters of the *MIR482f* gene. In all three analyzed promoter sequences for NAC  
304 transcription factor binding sites were detected (**Supplemental Dataset 10**). The promoter of  
305 *MIR167e* is only partially assembled in the current version of the potato genome; thus, the  
306 promoter analysis was performed only for the first 80 nt upstream of the predicted hairpin  
307 precursor sequence (**Supplemental Dataset 10**).

308

### 309 **SA depletion attenuates sRNA response following PVY<sup>NTN</sup> infection**

310 As the link between repression of GA signaling and disease symptoms severity was already  
311 established in Arabidopsis (Du et al., 2014) we have further investigated the activity of  
312 discovered sRNA-GA circuit in susceptible potato-PVY<sup>NTN</sup> interaction. We have shown  
313 previously that SA depletion breaks the equilibrium between disease and tolerance. In NahG-  
314 Désirée plants the pronounced disease symptoms appeared both on the inoculated and  
315 systemic leaves (Baebler et al., 2011). Furthermore, the viral multiplication was detected 1  
316 day earlier than in non-transgenic Désirée plants (at 4 dpi), while the final concentrations of  
317 the virus were not significantly higher (Baebler et al., 2011). Here, we performed the analysis  
318 of sRNA response as well as the measurements of hormonal concentrations in interaction of  
319 this susceptible genotype with the virus. Interestingly, we found that the overall response of  
320 sRNAs was attenuated in NahG-Désirée at 3 dpi. In NahG-Désirée only 20 miRNAs were  
321 differentially expressed, with the majority showing a lower degree of induction than in  
322 Désirée plants (**Figure 3 and 4A, Supplemental Dataset 1**).

323

### A miRNAs

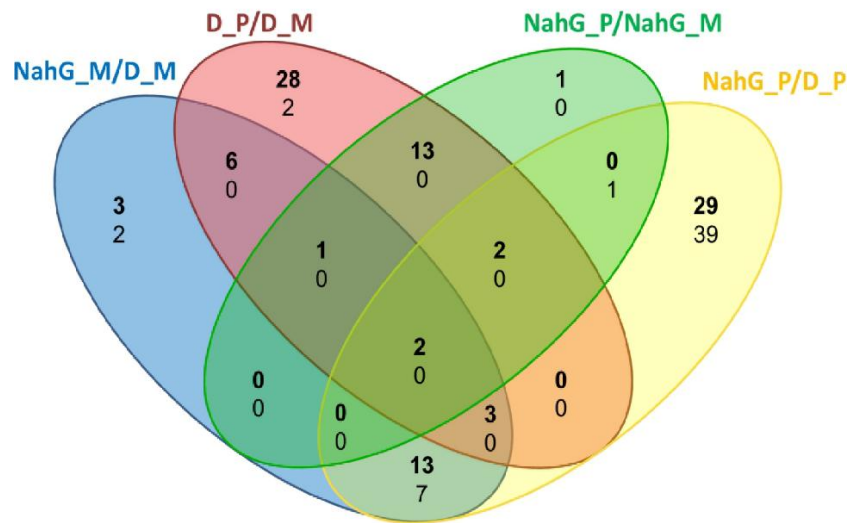

### B phasiRNAs

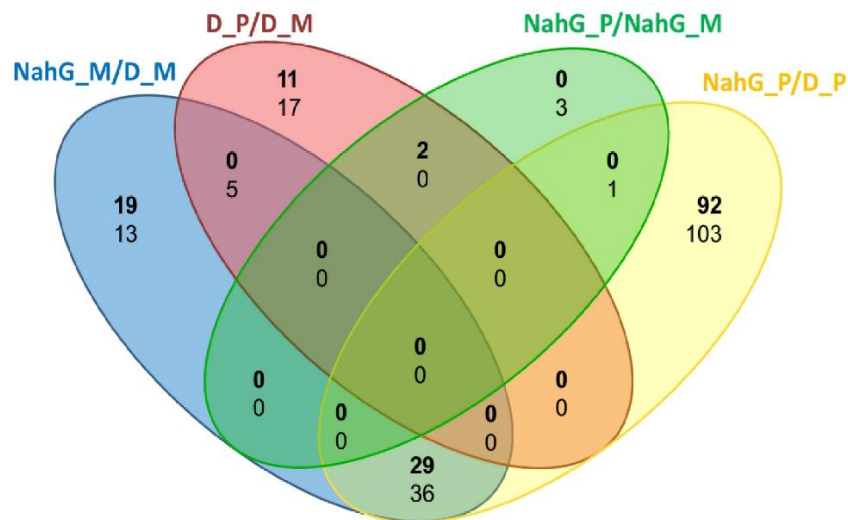

324

325 **Figure 3. Numbers of unique and common differentially expressed miRNAs and phasiRNAs 3 days post**  
 326 **PVY<sup>NTN</sup> inoculation in comparison of SA-deficient and nontransgenic Désirée plants.** Venn diagrams show  
 327 the number of differentially expressed (FDR corrected p-value < 0.05) (A) miRNAs and (B) phasiRNAs in  
 328 mock- or PVY<sup>NTN</sup>-inoculated potato leaves of cv. Désirée and NahG-Désirée. Upregulated miRNAs/phasiRNAs  
 329 are shown in bold and downregulated in normal text. D – Désirée, NahG – NahG-Désirée, M – mock, P –  
 330 PVY<sup>NTN</sup>.

331

332 Inspecting specifically the discovered link between sRNAs regulation, GA signaling and  
 333 immune signaling in the sRNA and transcriptional datasets we observed that the responses of  
 334 miR167e and miR319a are diminished in NahG-Désirée plants (**Figure 4B, Supplemental**  
 335 **Dataset 1**). Interestingly, although the phasiRNA931 was also upregulated in NahG-Désirée  
 336 plants, albeit to a lower extent, this was not translated into downregulation at the target  
 337 transcript level (**Figure 4B, Supplemental Dataset 5**). Adding to the significance of this  
 338 finding, in NahG-Désirée plants the level of bioactive GA was not significantly different in

339 infected leaves (**Figure 4C**). Furthermore, the relieved silencing of LRR-RLKs by miR6022  
340 that is predicted to modulate immune response and which is also linked with GAMYBs was  
341 absent in NahG-Désirée plants (**Supplemental Figure 4B**). We also inspected sRNA-  
342 mediated responses which resembled responses in mutualistic symbioses in tolerant plants of  
343 Désirée and found that miR482e was also upregulated in NahG plants, while regulation of  
344 miR164, miR167, miR169, miR171, miR319, miR390, miR393, miR397, miR398, was  
345 diminished (**Supplemental Dataset 1**).  
346

A

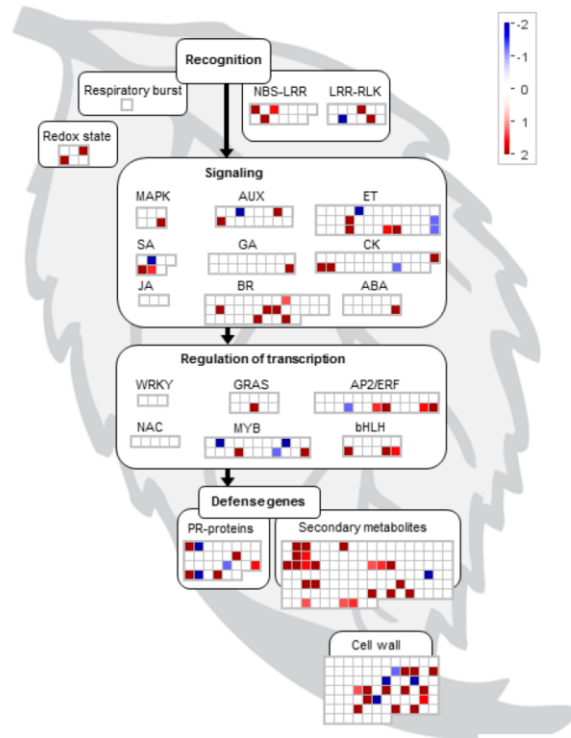

B

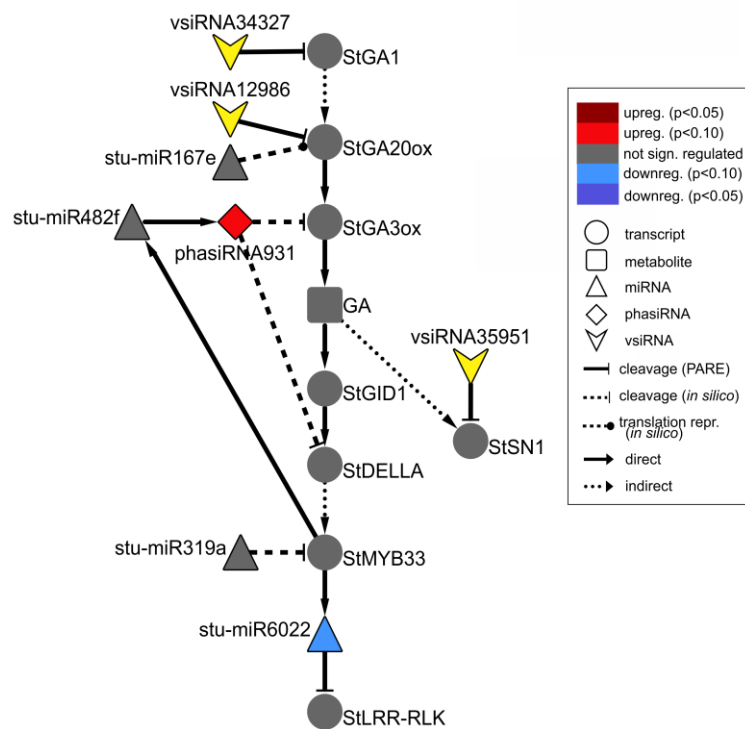

C

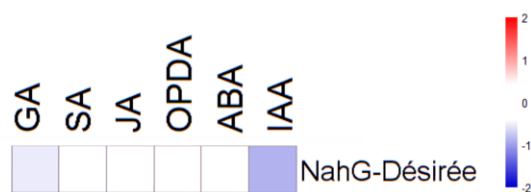

348 **Figure 4. sRNA response is attenuated in susceptible SA depleted plants following PVY<sup>NTN</sup> infection. (A)**  
349 Visualization of differentially expressed miRNAs/phasiRNAs in PVY<sup>NTN</sup>-infected NahG-Désirée according to  
350 the function of their targets. Each square represents log<sub>2</sub> ratios of expression between PVY<sup>NTN</sup>- and mock-  
351 inoculated plants (red – upregulated; blue – downregulated). **(B)** Network of endogenous sRNAs and vsRNAs  
352 targeting mRNAs of GA biosynthesis and signaling pathways in NahG-Désirée 3 days post PVY<sup>NTN</sup> inoculation.  
353 **(C)** Concentrations of a set of plants hormones in NahG-Désirée 3 days after PVY<sup>NTN</sup> infection. The levels of all  
354 analyzed hormones remained unchanged in NahG plants following PVY<sup>NTN</sup> infection. Colors present as log<sub>2</sub>  
355 ratios of mean concentrations between PVY<sup>NTN</sup>- and mock-inoculated plants (n=4; red – increased, blue –  
356 decreased level). \* - indicate statistically significant values (ANOVA; p < 0.05). For abbreviations and other  
357 details of the scheme, see the caption of **Figure 2**.

358

359 To evaluate the direct effect of the SA deficiency in NahG plants, independently of the viral  
360 infection, we also compared the sRNA expression profiles in mock-inoculated leaves of non-  
361 transgenic and SA-depleted Désirée (**Figure 3**). We found 37 miRNAs regulated by SA. It  
362 seems that SA in the normal growing conditions generally causes the reduction in the level of  
363 miRNAs as majority (28) of miRNAs were detected at significantly higher levels in NahG-  
364 Désirée plants (**Supplemental Dataset 1**). When we similarly compared the expression  
365 profile of transcripts between the two genotypes we detected that the most strongly induced  
366 by SA signaling are notably different WRKY transcription factors (**Table 1, Supplemental**  
367 **Dataset 11 and 12**), among them orthologues of Arabidopsis *WRKY70*, which was already  
368 shown to be positively regulated by SA (Li et al., 2004). As *MIR319a* and *MIR482f* promoters  
369 are regulated by WRKY transcription factors (**Supplemental Dataset 10**), we discovered a  
370 direct link between SA signaling and miRNA regulatory network in potato.

371

## 372 **Discussion**

373 We hypothesized that fine-tuned regulation of subsets of genes involved in defensive  
374 signaling can interfere with developmental signaling, which could explain decreased symptom  
375 severity in plants expressing tolerance to virus infection. The sRNAs have proven to be an  
376 important level for precise regulation of several developmental processes. We here show that  
377 the integration of sRNA network and transcriptional regulation is also crucial in entanglement  
378 of immune responses and developmental processes.

379

380 Integration of the sRNA regulatory network with sRNA expression and expression profiles of  
381 their targets confirmed many known, but also revealed several novel regulatory circuits  
382 associated with immunity regulation and hormone signaling (**Figure 1 and 2, Supplemental**  
383 **Figure 3 and 4, Supplemental Dataset 5 and 6**). When plants are exposed to pathogens,

384 NBS-LRRs and LRR-RLKs are the key players in sensing and transducing stress signals  
385 (Jones and Dangl, 2006; Antolin-Llovera et al., 2014). Viral suppressors of silencing can  
386 release the tight control of *R*-gene silencing by sRNAs and activate immune responses in  
387 plants (Shivaprasad et al., 2012; Li et al., 2011). Our study investigated regulatory processes  
388 occurring early after infection, before virus concentration significantly increased thus the  
389 effects we detected were not caused by extensive HCPro or any other viral protein  
390 accumulation. Even so, we have detected diverse regulation of NBS-LRRs and LRR-RLKs  
391 and their targeting miRNAs as expected according to their specialized roles (**Supplemental**  
392 **Figure 4**). On the other hand, similarity of response between mutualistic symbiosis in  
393 legumes and tolerance in potato was shown by the miR6022-relieved silencing of LRR-RLKs  
394 as well as by profiles of several other miRNAs (**Supplemental Figure 4A, Supplemental**  
395 **Dataset 1**; (Mao et al., 2013; Yan et al., 2015; Lelandais-Brière et al., 2009; De Luis et al.,  
396 2012)). This suggests a similar sRNA network modulation of immune response and  
397 physiology occurs in both mutualistic and disease tolerant (commensalistic) interactions. In  
398 tolerance, plants may adopt some processes resembling mutualistic symbiosis to control plant  
399 response and minimize severe disease symptoms allowing non-hindered development of the  
400 plant and at the same time multiplication of the virus.

401  
402 Phytohormones modulate plant defense responses against various biotic and abiotic stresses as  
403 well as plant growth and development (Huot et al., 2014). Till now, several miRNAs were  
404 confirmed to participate in this complex network, mainly in connection to repression of auxin  
405 signaling (Navarro et al., 2005). A similarly complex miR393/miR396/phasiTIR auxin  
406 signaling network was identified in this study, yet showing links also to other hormonal  
407 signaling pathways (**Figure 1, Supplemental Figure 3**).

408  
409 Most notable is, however, the novel link between sRNA regulatory network and GA  
410 biosynthesis and signaling. Biotic stress was shown to repress GA signaling pathways (Wang  
411 et al., 2007). Here, we show that GA biosynthesis and signaling are post-transcriptionally  
412 regulated via multiple miRNAs, phasiRNAs as well as vsiRNAs in potato leaves following  
413 infection with PVY<sup>NTN</sup> (**Figure 2B**). The effect of this regulatory circuit was confirmed by  
414 reduced bioactive GA level in the tolerant Désirée plants (**Figure 2C**). This reduction was  
415 however not reflected in decreased plant growth and was thus most probably transient and  
416 localized in nature (Karasov et al., 2017). In other plant species, GA biosynthesis was  
417 shown to be indirectly targeted by miRNAs regulating the activity of the corresponding



418 transcription factors (miR319-TCP14-GA2ox/GA20ox; miR393-GRF2-GA3ox/GA20ox)  
419 (Curaba et al., 2014), while direct interactions were to our knowledge not yet reported.  
420 Also of note, the sRNAs regulating GA biosynthesis identified here were not identified in  
421 Arabidopsis and seem to be Solanaceae specific.

422

423 Moreover, downstream GA signaling components are affected by the sRNA regulatory  
424 network as well. *StMYB33*, an orthologue of Arabidopsis GAMYB proteins, *MYB33*, is  
425 regulated by miR319a, a close relative of miR159 (Palatnik et al., 2007). The two  
426 Arabidopsis *GAMYBs* were shown to be regulated by miR159 (Allen et al., 2007). The  
427 functional relation between lower activity of GA signaling was already directly confirmed to  
428 be related to disease severity in three different experimental systems. Arabidopsis *GAMYB*  
429 double knockout showed ameliorated symptoms when infected with *Cucumber mosaic*  
430 *virus* (CMV) (Du et al., 2014), similarly was shown in rice in interaction with bacteria  
431 (*Xanthomonas oryzae* pv. *oryzae*) and fungi (*Magnaporthe oryzae*) using knockout in GA  
432 deactivating enzyme (Yang et al., 2008). Also in line with this, decrease in GA levels and  
433 increase in DELLA protein concentrations was shown to trigger components of rhizobial  
434 and mycorrhizal signaling (Jin et al., 2016; Fonouni-Farde et al., 2016; Calvo et al., 2004;  
435 Ghachtouli et al., 1996; Floss et al., 2013), showing yet another similarity between tolerant  
436 response of potato to viral infection and response of plants in mutualistic symbiosis.

437

438 With the discovery of GAMYB binding sites in the *MIR482f* and *MIR6022* promoters  
439 (**Supplemental Dataset 10**), we found the circuit in sRNA-GA signaling and additionally a  
440 link between GA signaling and *R*-gene expression. The complexity of regulatory responses  
441 observed in this study (**Figure 5**) is in line with the systems biology paradigm that interaction  
442 of multiple components and not a single component within a cell leads to much of biological  
443 function (Westerhoff et al., 2015). Although the reductionist approach is powerful in building  
444 logically simple hypotheses and devising ways to test them, it is very difficult to reconstitute  
445 the function for a whole biological system based solely on that as the behavior of the system  
446 may depend heavily on complex interactions within the system (Katagiri, 2003). Thus, we  
447 have adopted a systems level confirmation of our hypothesis that sRNA-GA-immune  
448 signaling circuit is important for establishment of tolerant interaction. Previously, we had  
449 demonstrated that SA regulates plant responses to virus infection; not only by delaying viral  
450 multiplication, but also by controlling disease symptom severity, most probably via its effects

451 on host primary metabolism (Baebler et al., 2011). In this study we have confirmed that  
452 response of sRNA regulatory networks controlling potential immune receptors and hormonal  
453 signaling is strongly attenuated in the NahG-transgenic plants in the early stage of viral  
454 infection (3 dpi; **Figure 3 and 4**) showing the role of sRNAs in linking immune signaling and  
455 symptomology. The molecular mechanisms of the link between SA signaling and sRNA  
456 network are also complex. SA has been shown to induce *RNA-dependent RNA polymerase 1*  
457 expression, which is crucial for the maintenance of basal resistance to several RNA viruses  
458 (Carr et al., 2010; Yu et al., 2003) but none of the silencing mechanism related enzymes are  
459 regulated in SA deficient NahG-Désirée plants (**Supplemental Dataset 11**; (Stare et al.,  
460 2015)). We have here predicted and experimentally confirmed SA-directed transcriptional  
461 regulation of *MIR482f*, the miRNA linking the GA signaling circuit and *R*-gene expression  
462 (**Figure 5, Supplemental Dataset 1 and 10**), which could be additional link between SA  
463 signaling and symptoms development in potato-PVY interaction. An additional link are the  
464 WRKY transcription factors that are under positive control of SA (**Table 1, Supplemental**  
465 **Dataset 11 and 12**) and were predicted to regulate promoters of all three miRNAs involved in  
466 sRNA-GA circuit (**Figure 5, Supplemental Dataset 10**).

467

468 The outcome of plant-pathogen interactions depends on the delicate balance between plant  
469 immune signaling network and its interaction with pathogen. Here, we focused on the roles of  
470 sRNA networks in establishment of the tolerance to PVY infection. We showed that the  
471 sRNA regulatory network links immune and developmental signaling in potato through newly  
472 discovered sRNA-GA circuit. Tolerance of potato to virus infection perturbs sRNA network  
473 resulting in downregulation of GA-mediated signaling, as well as modulation of *R*-gene  
474 transcript levels; this results in amelioration of disease symptoms. Supporting this, the  
475 responses observed for individual miRNAs are similar as observed in establishment of  
476 mutualistic symbioses. It is thus plausible that a similar modulation of plant responses occurs  
477 in both mutualistic symbiosis and tolerance. This is in line with growing evidence showing  
478 that viruses, like other symbionts, lie on a continuum between antagonistic and mutualistic  
479 relationships (Roossinck, 2015; Kamitani et al., 2016).

480

481

482

## 483 **Methods**

484

### 485 **Plant material**

486 Potato leaves of cv. Désirée were mock or PVY<sup>NTN</sup>-inoculated (isolate NIB-NTN, GenBank  
487 accession no. AJ585342) as described previously (Stare et al., 2015). Plant material of the  
488 inoculated leaves was collected 3 days post inoculation (dpi, corresponding to early stages of  
489 viral multiplication in both genotypes and before symptoms development in NahG-Désirée  
490 plants) for each treatment. Three and four biological replicates (individual leaves from  
491 different plants per group) were analyzed for RNA analysis and for hormonal measurements,  
492 respectively. Three plants from each group were monitored for plant height, till 21 dpi, when  
493 they all started to senesce. The same experimental set up was designed also for analysis of  
494 transgenic NahG-Désirée plants (Halim et al., 2004).

495

### 496 **RNA extraction, library preparation and sRNA sequencing**

497 Total RNA was extracted from 100 mg of homogenized leaf tissue using TRIzol reagent  
498 (Thermo Fisher Scientific, Waltham, MA) and MaXtract High Density tubes (Qiagen, Hilden,  
499 Germany) following manufacturers' protocols. RNA concentration, quality and purity were  
500 assessed using agarose gel electrophoresis and NanoDrop ND-1000 spectrophotometer  
501 (Thermo Scientific). sRNA NGS libraries were generated from total RNA samples using the  
502 TailorMix miRNA Sample Preparation Kit (SeqMatic LLC, Fremont, CA) and sequenced on  
503 the Illumina HiSeq 2000 Sequencing System at SeqMatic LLC.

504

505

### 506 **Identification of endogenous and virus-derived sRNAs**

507 The raw reads were quality filtered using Filter Tool of the UEA sRNA Toolkit (Moxon et al.,  
508 2008) by discarding low complexity reads (containing at most two distinct nucleotides), reads  
509 shorter than 18 nt and longer than 25 nt, reads matching tRNA/rRNA sequences and reads not  
510 mapped to the potato genome (PGSC\_DM\_v4.3) (Xu et al., 2011). To identify known  
511 annotated miRNAs, the remaining reads were compared to all plant miRNAs registered in  
512 miRBase database (release 21) (Kozomara and Griffiths-jones, 2014), allowing no  
513 mismatches. The sequences that matched mature miRNAs from other plants than potato  
514 (miRNA orthologs), were mapped to the potato genome to find corresponding *MIR* loci able

515 to form hairpin structure (An et al., 2014) and named according to annotation of conserved  
516 miRNA (Meyers et al., 2008). miRNAs that had different 5' and 3' ends with respect to the  
517 mature miRNA, were annotated as isomiRs. To identify novel unannotated miRNAs, filtered  
518 reads were submitted to miRCat tool of the UEA sRNA Toolkit using default parameters for  
519 plants, considering only reads of lengths 18-24 nt. Reads were first mapped to the potato  
520 genome, then the 100 and 200 nt long windows around the aligned reads were extracted (An  
521 et al., 2014). The predicted secondary structures were trimmed and analyzed to verify the  
522 characteristic hairpin pre-miRNA structure according to plant miRNAs annotation criteria  
523 (Meyers et al., 2008). An additional criterion we have imposed was that novel miRNAs  
524 should be present at least in two analyzed samples with more than five raw reads. Potential  
525 novel miRNAs were mapped against miRBase and sequences that matched known plant  
526 miRNAs with up to three mismatches were excluded. The novelty of potato specific miRNAs  
527 was verified with the miRPlant version 5 (An et al., 2014) using default parameters and  
528 additionally rechecked against the latest releases of Rfam (Nawrocki et al., 2015);  
529 <http://rfam.xfam.org/>), tRNA (Chan and Lowe, 2016); <http://gtrnadb.ucsc.edu/>) and snoRNA  
530 databases (Yoshihama et al., 2013); <http://snoopy.med.miyazaki-u.ac.jp/>). Families of novel  
531 miRNAs were determined by clustering their sequences with sequences of known miRNAs  
532 using CD-HIT with identity threshold of 0.9 (Huang et al., 2010). To identify vsiRNAs, reads  
533 of lengths 20-24 nt from all PVY<sup>NTN</sup>-infected samples were mapped to the reconstructed  
534 consensus PVY<sup>NTN</sup> genome (Kutnjak et al., 2015) using CLC Genomics Workbench version 8  
535 (<http://www.clcbio.com/>) allowing only 100 % identity.

536

### 537 **Prediction of novel potato phasiRNAs and *PHAS* loci**

538 Prediction of phasiRNAs and phasiRNA-producing loci (*PHAS* loci) was performed using ta-  
539 siRNA prediction tool (Chen et al., 2007) utilizing the potato genome (Xu et al., 2011) and  
540 the merged potato gene and unigene sequences StNIB\_v1 (Ramšak et al., 2014). To detect  
541 *PHAS* loci with a significant degree of phasing ( $p < 0.0001$ ) and to investigate whether  
542 phasing also occurs in sRNAs with phase sizes different from 21 nt, different phasing  
543 intervals ranging from 21 to 24 nt were analyzed.

544

545

546

## 547 **sRNA quantification and statistical analysis**

548 Differential expression analysis was performed in R (R development Core Team, 2011;  
549 version 3.2.2), using the limma package (Ritchie et al., 2015). In short, sRNA counts with a  
550 baseline expression level of at least two RPM (reads per million of mapped reads) in at least  
551 three samples were TMM-normalized (edgeR package, (Robinson et al., 2009)) and log-  
552 transformed using voom function (Law et al., 2014). To identify differentially expressed  
553 sRNAs the empirical Bayes approach was used and the resultant p-values were adjusted using  
554 Benjamini and Hochberg's (FDR) method. Adjusted p-values below 0.05 were considered  
555 statistically significant.

556

## 557 **Stem-loop RT-qPCR**

558 Stem-loop RT-qPCR was used to quantify the expression of six target miRNAs in relation to  
559 the endogenous control (stu-mir167a-5p.1), which was determined to be the most robustly  
560 expressed in a sRNA sequencing dataset of potato plants that were uninfected or infected with  
561 a range of viruses (PVY, PLRV, PVS, PVX, PVT) (SRA accession no. SRP083247). TaqMan  
562 MicroRNA Assays (Thermo Fisher Scientific) were ordered according to the sRNA-Seq  
563 sequence of the selected miRNAs (**Supplemental Table 2**). Total RNA (1 µg) of the same  
564 samples as used for sRNA-Seq was DNase I (Qiagen) treated and reverse transcribed using  
565 SuperScript III First-Strand Synthesis System (Thermo Fisher Scientific) and stem-loop  
566 Megaplex primer pool (Thermo Fisher Scientific) following the manufacturer's protocol and  
567 previously optimized cycling parameters (Varkonyi-Gasic et al., 2007). No template control  
568 RT reactions were set to assess potential Megaplex primer pool background. qPCR reactions  
569 were performed in 10 µl volume on the LightCycler480 (Roche Diagnostics Ltd., Rotkreuz,  
570 Switzerland) in duplicates and two dilutions (8- and 80-fold) per sample using TaqMan  
571 Universal Master Mix II, no UNG (Thermo Fisher Scientific) and TaqMan MicroRNA Assays  
572 following the manufacturers' protocols. Additionally, for each miRNA assay, a standard  
573 curve was constructed from a serial dilution of the pool of all samples. Raw Cq values were  
574 calculated using the second derivative maximum method (Roche Diagnostics Ltd.) and  
575 miRNA expression was quantified using a relative standard curve method by normalization to  
576 the endogenous control (Baebler et al., 2011). The statistical significance was assessed by  
577 Student's t-test.

578

## 579 **sRNA target prediction**

580 *In silico* identification of potato transcripts targeted by identified sRNAs was carried out using  
581 the psRNATarget ((Dai and Zhao, 2011); <http://plantgrn.noble.org/psRNATarget/>) and  
582 StNIB\_v1 sequences (Ramšak et al., 2014), following previously described parameters  
583 (Zhang et al., 2013). Moreover, targets of identified sRNAs were experimentally validated  
584 with parallel analysis of RNA ends (PARE) Degradome-Seq. The four degradome libraries  
585 (mock Désirée, PVY Désirée, mock NahG-Désirée, PVY NahG-Désirée) were constructed by  
586 pooling RNA of the biological replicates and sequenced on the Illumina HiSeq 2500 platform.  
587 The data were analyzed at LC Sciences (Houston, TX) with CleaveLand4 ((Addo-Quaye et  
588 al., 2009); <http://sites.psu.edu/axtell/software/cleaveland4/>) using all our experimentally  
589 identified sRNAs and the StNIB\_v1 sequences allowing for maximum three mismatches. All  
590 identified degradation targets were classified into 5 categories as previously described (Addo-  
591 Quaye et al., 2009). Only categories 0-3 with high cleavage signal were considered as reliable  
592 cleavage. Results of miRNA-target (*PHAS* loci) interactions were also used to reveal miRNA  
593 triggers of the phasiRNA production. Only 22-nt miRNAs were kept as potential triggers  
594 (Chen et al., 2010; Cuperus et al., 2010).

595

## 596 **Regulatory network construction**

597 In order to compare the expression of sRNAs with the expression of their target transcripts we  
598 used a microarray gene expression dataset generated from the same samples ((Stare et al.,  
599 2015); GEO accession no. GSE58593). All differentially expressed miRNAs and phasiRNAs  
600 were analyzed for functional overrepresentation in biological pathways with MapMan  
601 software (Usadel et al., 2009) using the ontology adapted for potato (Rotter et al., 2007;  
602 Ramšak et al., 2014). All sRNAs and their targets, obtained by *in silico* prediction and  
603 Degradome-Seq were integrated with their expression data and used for construction of  
604 regulatory networks in Cytoscape 3.4 (Shannon et al., 2003).

605

## 606 **Identification of *cis*-regulatory elements in promoter regions of *MIR* genes**

607 1000 nt sequences upstream of the predicted *MIR* gene hairpin sequences were extracted as  
608 putative miRNA promoter regions (Megraw and Hatzigeorgiou, 2010) and scanned for *cis*-  
609 regulatory elements of plant transcription factors using position weight matrices and  
610 transcription binding sites in TRANSFAC (Matys et al., 2003); [22](http://www.biobase-</a></p></div><div data-bbox=)

611 [international.com/product/transcription-factor-binding-sites](http://international.com/product/transcription-factor-binding-sites)) and PlantCARE (Lescot et al.,  
612 2002); <http://bioinformatics.psb.ugent.be/webtools/plantcare/html/>) databases.

### 613 **Hormonal measurements**

614 Hormone contents were determined by gas chromatography coupled with mass spectrometry  
615 (GC-MS). Approximately 100 mg of plant material was collected for each sample and 1 ml of  
616 100% methanol (HPLC grade) was added. The following stable isotope-labeled compounds  
617 were added as internal standards to each sample prior to the extraction: 50 pmol [<sup>2</sup>H<sub>4</sub>]-SA,  
618 50 pmol [<sup>2</sup>H<sub>5</sub>]-JA, 50 pmol [<sup>2</sup>H<sub>2</sub>]-IAA, 50 pmol [<sup>2</sup>H<sub>2</sub>]-GA A<sub>3</sub>, 33 pmol [<sup>2</sup>H<sub>6</sub>]-ABA, 15 pmol  
619 [<sup>2</sup>H<sub>5</sub>]-OPDA. Next, the samples were heated at 60 °C for 5 min and then incubated at room  
620 temperature for 1 h with occasional vortexing. The methanolic phase was taken to complete  
621 dryness *in vacuo*. The resulting residue was dissolved in methanol (50 µl) to which diethyl  
622 ether (200 µl) was added. The samples were sonified (5 min) and centrifuged (5 min, 14,000  
623 g). The particle-free supernatant was loaded to aminopropyl solid-phase extraction cartridges  
624 (Chromabond NH<sub>2</sub> shorty 10 mg; Macherey–Nagel GmbH, Düren, Germany). Each cartridge  
625 was washed twice with CHCl<sub>3</sub>:2-propanol (2:1, v/v, 250 µl) before the hormone containing  
626 fraction was eluted with acidified diethyl ether (2 % acetic acid, v/v, 400 µl). The eluates were  
627 transferred into 0.8 ml autosampler vials and again taken to dryness in a gentle stream of  
628 nitrogen. Prior to MS assessment, the samples were derivatized with a 20 µl of a mix of  
629 acetone:methanol (9:1, v/v, 220 µl), diethyl ether (27 µl) and (trimethylsilyl)diazomethane  
630 solution (2.0 M in diethyl ether, 3 µl) and letting them rest for 30 min at room temperature.  
631 The setting for the GC and the MS were as described previously (Sanz et al., 2014). For the  
632 determination of endogenous and stable isotope-labeled methylated acidic plant hormones,  
633 respectively, the following ion transitions were recorded: MeSA m/z 152 to m/z 120 and m/z  
634 156 to m/z 124 for [<sup>2</sup>H<sub>4</sub>]-MeSA, retention time 6.75 ± 0.4 min; MeOPDA m/z 238 to m/z 163  
635 and m/z 243 to m/z 168 for [<sup>2</sup>H<sub>5</sub>]-MeOPDA, retention time 10.00 ± 0.4 min; MeJA m/z 224 to  
636 m/z 151 and m/z 229 to m/z 154 for [<sup>2</sup>H<sub>5</sub>]-MeJA, retention time 11.27 ± 0.5 min; MeIAA m/z  
637 189 to m/z 130 and m/z 191 to m/z 132 for [<sup>2</sup>H<sub>2</sub>]-MeIAA, retention time 13.34 ± 0.4 min;  
638 MeABA m/z 162 to m/z 133 and m/z 168 to m/z 139 for [<sup>2</sup>H<sub>6</sub>]-MeABA, retention time  
639 15.78 ± 0.4 min; and MeGA m/z 136 to m/z 120 and m/z 138 to m/z 122 for [<sup>2</sup>H<sub>2</sub>]-MeGA,  
640 retention time 21.67 ± 0.6 min. The amounts of endogenous hormone contents were  
641 calculated from the signal ratio of the unlabeled over the stable isotope-containing mass  
642 fragment observed in the parallel measurements. Significant changes in hormone  
643 concentrations between treatment-genotype groups were determined by ANOVA followed by

644 LSD post hoc analysis (Benjamini Hochberg FDR p-value adjustment,  $\alpha= 0.05$ ) using the  
645 Agricolae R package.

646

### 647 **Gene set enrichment analysis**

648 To identify SA regulated genes in cv. Désirée the normalized expression values between  
649 mock NahG-Désirée vs. Désirée and PVY-infected NahG-Désirée vs. Désirée samples were  
650 compared (calculated from the 3 dpi samples; data of Stare et al. (Stare et al., 2015). Gene  
651 Set Enrichment Analysis (GSEA; (Subramanian et al., 2005) was performed (false discovery  
652 rate corrected  $q \leq 0.01$ ) comparing expression profiles between both genotypes, using  
653 MapMan ontology as the source of the gene sets.

654

### 655 **Data deposition and Gene IDs**

656 The sRNA and Degradome-Seq data can be accessed at the NCBI's Gene expression omnibus  
657 (GEO) under accession numbers GSE84851 and GSE84967. Full list of gene/protein names  
658 used in this manuscript, together with their Gene IDs, short names, Arabidopsis orthologue  
659 genes is given in **S1 Table**.

660

### 661 **Author Contributions**

662 Conceptualization, M.K., M.P., D.D., Š.B., J.K., J.Z., and K.G.; Methodology, M.K., M.P.,  
663 D.D., Ž.R., Š.B., S.P., K.G.; Formal Analysis, M.K., M.P., Ž.R., K.G.; Investigation, M.K.,  
664 M.P., Š.B., S.P. and K.G.; Writing – Original Draft, M.K., K.G.; Writing – Review & Editing,  
665 M.K., M.P., D.D., Ž.R., Š.B., S.P., J.K., J.Z., and K.G.; Visualization, M.K., M.P., K.G.;  
666 Supervision, K.G., Funding Acquisition, J.Z., K.G.

667

### 668 **Funding**

669 This research was funded by the Slovenian Research Agency (projects 1000-15-0105, J1-  
670 4268, P4-0165, N4-0026, J4-7636).

671



## 672 **Acknowledgments**

673 The authors would like to acknowledge dr. Tjaša Stare for providing plant material, dr. Sabine  
674 Rosahl for providing NahG-Désirée potato plants. Katja Stare and Tjaša Lukan for technical  
675 support, Maja Zagorščak for providing the script to determine the location of *MIR* loci in the  
676 potato genome, dr. Denis Kutnjak for the help with PVY<sup>NTN</sup> genome assembly and dr. John  
677 Carr and dr. Anna Coll Rius for critical reading of the manuscript and fruitful discussions.

678

## 679 **References**

- 680 Addo-Quaye, C., Miller, W. and Axtell, M.J. (2009). CleaveLand: A pipeline for using  
681 degradome data to find cleaved small RNA targets. *Bioinformatics*. **25**:130–131.
- 682 Allen, R.S., Li, J., Stahle, M.I., Dubroué, A., Gubler, F. and Millar, A.A. (2007). Genetic  
683 analysis reveals functional redundancy and the major target genes of the Arabidopsis  
684 miR159 family. *Proc. Natl. Acad. Sci.* **104**:16371–16376.  
685 <http://www.pnas.org/content/104/41/16371>  
686 <http://www.ncbi.nlm.nih.gov/pubmed/17916625>  
687 <http://www.pnas.org/content/104/41/16371.full.pdf>  
<http://www.pnas.org/content/104/41/16371.short>.
- 688 An, J., Lai, J., Sajjanhar, A., Lehman, M. and Nelson, C. (2014). miRPlant: an integrated tool  
689 for identification of plant miRNA from RNA sequencing data. *BMC Bioinformatics*.  
690 **15**:275. <http://dx.doi.org/10.1186/1471-2105-15-275>.
- 691 Antolin-Llovera, M., Petutsching, E.K., Katharina, M. and Parniske, M. (2014). Knowing  
692 your friends and foes – plant receptor-like kinases as initiators of symbiosis or defence.  
693 **2**:791–802.
- 694 Axtell, M.J., Jan, C., Rajagopalan, R. and Bartel, D.P. (2006). A Two-Hit Trigger for siRNA  
695 Biogenesis in Plants. *Cell*. **127**:565–577.
- 696 Baebler, Š. et al. (2011). Dynamics of responses in compatible potato - potato virus y  
697 interaction are modulated by salicylic acid. *PLoS One*. **6**: e29009.
- 698 Baulcombe, D. (2004). RNA silencing in plants. *Nature*. **431**:356–363.
- 699 Borges, F. and Martienssen, R.A. (2015). The expanding world of small RNAs in plants. *Nat.*  
700 *Publ. Gr.* **16**:1–15.

- 701 <http://dx.doi.org/10.1038/nrm4085%5Cnpapers3://publication/doi/10.1038/nrm4085>.
- 702 Bosch, F.V.A.N.D.E.N., Akudibilah, G., Seal, S.U.E. and Jeger, M. (2006). Host resistance  
703 and the evolutionary response of plant. 506–516.
- 704 Calvo, A.P., Nicolás, C., Nicolás, G. and Rodríguez, D. (2004). Evidence of a cross-talk  
705 regulation of a GA 20-oxidase (FsGA20ox1) by gibberellins and ethylene during the  
706 breaking of dormancy in *Fagus sylvatica* seeds. *Physiol. Plant.* **120**:623–630.
- 707 Carr, J.P., Lewsey, M.G. and Palukaitis, P. (2010). Signaling in Induced Resistance. In  
708 *Advances in Virus Research*. Elsevier Inc., pp. 57–121. <http://dx.doi.org/10.1016/S0065->  
709 [3527\(10\)76003-6](http://dx.doi.org/10.1016/S0065-3527(10)76003-6).
- 710 Chan, P.P. and Lowe, T.M. (2016). GtRNAdb 2.0: an expanded database of transfer RNA  
711 genes identified in complete and draft genomes. *Nucleic Acids Res.* **44**:D184-9.  
712 <http://nar.oxfordjournals.org/cgi/content/long/gkv1309v1>.
- 713 Chellappan, P., Xia, J., Zhou, X., Gao, S., Zhang, X., Coutino, G., Vazquez, F., Zhang, W.  
714 and Jin, H. (2010). siRNAs from miRNA sites mediate DNA methylation of target genes.  
715 *Nucleic Acids Res.* **38**:6883–6894.
- 716 Chen, D., Meng, Y. and Yuan, C. (2011). Plant siRNAs from introns mediate DNA  
717 methylation of host genes Plant siRNAs from introns mediate DNA methylation of host  
718 genes. 1012–1024.
- 719 Chen, H.-M., Chen, L.-T., Patel, K., Li, Y.-H., Baulcombe, D.C. and Wu, S.-H. (2010). 22-  
720 Nucleotide RNAs trigger secondary siRNA biogenesis in plants. *Proc. Natl. Acad. Sci.*  
721 *U. S. A.*
- 722 Chen, H., Li, Y. and Wu, S. (2007). Bioinformatic prediction and experimental validation of a  
723 microRNA-directed tandem trans-acting siRNA cascade in *Arabidopsis*.
- 724 Coll, N.S., Epple, P. and Dangl, J.L. (2011). Programmed cell death in the plant immune  
725 system. *Cell Death Differ.* **18**:1247–1256. <http://dx.doi.org/10.1038/cdd.2011.37>.
- 726 Csorba, T., Kontra, L. and Burgyán, J. (2015). Viral silencing suppressors: Tools forged to  
727 fine-tune host-pathogen coexistence. *Virology.* **479–480**:85–103.
- 728 Cuperus, J.T. et al. (2010). Unique functionality of 22-nt miRNAs in triggering RDR6-  
729 dependent siRNA biogenesis from target transcripts in *Arabidopsis*. *Nat. Struct. Mol.*

- 730 Biol. **17**:997–1003. <http://www.nature.com/doi/10.1038/nsmb.1866>.
- 731 Curaba, J., Singh, M.B. and Bhalla, P.L. (2014). MiRNAs in the crosstalk between  
732 phytohormone signalling pathways. *J. Exp. Bot.* **65**:1425–1438.
- 733 Dai, X. and Zhao, P.X. (2011). PsRNATarget: A plant small RNA target analysis server.  
734 *Nucleic Acids Res.* **39**:1–5.
- 735 Devers, E.A., Branscheid, A., May, P. and Krajinski, F. (2011). Stars and Symbiosis :  
736 MicroRNA- and MicroRNA \* -Mediated Transcript Cleavage Involved in Arbuscular  
737 Mycorrhizal Symbiosis 1 [ W ][ OA ]. **156**:1990–2010.
- 738 Du, Z., Chen, A., Chen, W., Westwood, J.H., Baulcombe, D.C. and Carr, J.P. (2014). Using a  
739 viral vector to reveal the role of microRNA159 in disease symptom induction by a severe  
740 strain of Cucumber mosaic virus. *Plant Physiol.* **164**:1378–88.  
741 [http://www.pubmedcentral.nih.gov/articlerender.fcgi?artid=3938627&tool=pmcentrez&](http://www.pubmedcentral.nih.gov/articlerender.fcgi?artid=3938627&tool=pmcentrez&rendertype=abstract)  
742 [rendertype=abstract](http://www.pubmedcentral.nih.gov/articlerender.fcgi?artid=3938627&tool=pmcentrez&rendertype=abstract).
- 743 Floss, D.S., Levy, J.G., Lévesque-tremblay, V., Pumplin, N. and Harrison, M.J. (2013).  
744 DELLA proteins regulate arbuscule formation in arbuscular mycorrhizal symbiosis.  
745 **2013**:5025–5034.
- 746 Fonouni-Farde, C., Tan, S., Baudin, M., Brault, M., Wen, J., Mysore, K.S., Niebel, A.,  
747 Frugier, F. and Diet, A. (2016). DELLA-mediated gibberellin signalling regulates Nod  
748 factor signalling and rhizobial infection. *Nat. Commun.* **7**:12636.  
749 <http://www.nature.com/doi/10.1038/ncomms12636>.
- 750 Ghachtouli, N.E., Martin-Tanguy, J., Paynot, M. and Gianinazzi, S. (1996). First report of the  
751 inhibition of arbuscular mycorrhizal infection of *Pisum sativum* by specific and  
752 irreversible inhibition of polyamine biosynthesis or by gibberellic acid treatment. **385**:.  
753 Griffiths-Jones, S., Grocock, R.J., Dongen, S. van, Bateman, A. and Enright, A.J. (2006).  
754 miRBase: microRNA sequences, targets and gene nomenclature. *Nucleic Acids Res.*  
755 **34**:D140–D144.
- 756 Halim, V.A., Hunger, A., Macioszek, V., Landgraf, P., Nürnberger, T., Scheel, D. and Rosahl,  
757 S. (2004). The oligopeptide elicitor Pep-13 induces salicylic acid-dependent and -  
758 independent defense reactions in potato. *Physiol. Mol. Plant Pathol.* **64**:311–318.
- 759 Hohmann, U., Lau, K. and Hothorn, M. (2017). The Structural Basis of Ligand Perception

- 760 and Signal Activation by Receptor Kinases.
- 761 Huang, Y., Niu, B., Gao, Y., Fu, L. and Li, W. (2010). CD-HIT Suite: A web server for  
762 clustering and comparing biological sequences. *Bioinformatics*. **26**:680–682.
- 763 Huot, B., Yao, J., Montgomery, B.L. and He, S.Y. (2014). Growth-defense tradeoffs in plants:  
764 A balancing act to optimize fitness. *Mol. Plant*. **7**:1267–1287.
- 765 Ivanov, K.I., Eskelin, K., Bašić, M., De, S., Lõhmus, A., Varjosalo, M. and Mäkinen, K.  
766 (2016). Molecular insights into the function of the viral RNA silencing suppressor  
767 HCPro. *Plant J*. **85**:30–45.
- 768 Jin, Y. et al. (2016). DELLA proteins are common components of symbiotic rhizobial and  
769 mycorrhizal signalling pathways. *Nat. Commun*. **7**:12433.  
770 <http://www.nature.com/doi/10.1038/ncomms12433>.
- 771 Jones, J.D.G. and Dangl, J.L. (2006). The plant immune system. *Nature*. **444**:323–329.
- 772 Kamitani, M., Nagano, A.J., Honjo, M.N. and Kudoh, H. (2016). RNA-Seq reveals virus-  
773 virus and virus-plant interactions in nature. *FEMS Microbiol. Ecol*. **92**:1–11.
- 774 Karasev, A. V and Gray, S.M. (2013). Continuous and emerging challenges of Potato virus Y  
775 in potato. *Annu. Rev. Phytopathol*. **51**:571–86.  
776 <http://www.ncbi.nlm.nih.gov/pubmed/23915135>.
- 777 Karasov, T.L., Chae, E., Herman, J.J. and Bergelson, J. (2017). Mechanisms to Mitigate the  
778 Tradeoff between Growth and Defense.
- 779 Katagiri, F. (2003). Attacking Complex Problems with the Power of Systems Biology. *Plant*  
780 *Physiol*. **132**:417–419.
- 781 Kozomara, A. and Griffiths-jones, S. (2014). miRBase : annotating high confidence  
782 microRNAs using deep sequencing data. **42**:68–73.
- 783 Kutnjak, D., Rupar, M., Gutierrez-Aguirre, I., Curk, T., Kreuze, J.F. and Ravnkar, M. (2015).  
784 Deep sequencing of virus derived small interfering RNAs and RNA from viral particles  
785 shows highly similar mutational landscape of a plant virus population. *J. Virol*. **89**:4760–  
786 9. <http://jvi.asm.org/content/89/9/4760.abstract>.
- 787 Law, C.W., Chen, Y., Shi, W. and Smyth, G.K. (2014). voom: Precision weights unlock  
788 linear model analysis tools for RNA-seq read counts. *Genome Biol*. **15**:R29.

- 789 <http://genomebiology.com/2014/15/2/R29>.
- 790 Lelandais-Brière, C., Naya, L., Sallet, E., Calenge, F., Frugier, F., Hartmann, C., Gouzy, J.  
791 and Crespi, M. (2009). Genome-wide *Medicago truncatula* small RNA analysis revealed  
792 novel microRNAs and isoforms differentially regulated in roots and nodules. *Plant Cell*.  
793 **21**:2780–96. <http://www.plantcell.org/content/21/9/2780.short>.
- 794 Lescot, M., Déhais, P., Thijs, G., Marchal, K., Moreau, Y., Peer, Y. Van de, Rouzé, P. and  
795 Rombauts, S. (2002). PlantCARE, a database of plant cis-acting regulatory elements and  
796 a portal to tools for in silico analysis of promoter sequences. *Nucleic Acids Res.* **30**:325–  
797 7.  
798 [http://www.pubmedcentral.nih.gov/articlerender.fcgi?artid=99092&tool=pmcentrez&ren-](http://www.pubmedcentral.nih.gov/articlerender.fcgi?artid=99092&tool=pmcentrez&rendertype=abstract)  
799 [dertype=abstract](http://www.pubmedcentral.nih.gov/articlerender.fcgi?artid=99092&tool=pmcentrez&rendertype=abstract).
- 800 Li, F., Pignatta, D., Bendix, C., Brunkard, J.O., Cohn, M.M., Tung, J. and Sun, H. (2011).  
801 MicroRNA regulation of plant innate immune receptors. *Proc. Natl. Acad. Sci. U. S. A.*  
802 **109**:1790–1795.
- 803 Li, H., Deng, Y., Wu, T.L., Subramanian, S. and Yu, O. (2010). Misexpression of miR482,  
804 miR1512, and miR1515 increases soybean nodulation. *Plant Physiol.* **153**:1759–1770.
- 805 Li, J., Brader, G. and Palva, E.T. (2004). The WRKY70 Transcription Factor: A Node of  
806 Convergence for Jasmonate-Mediated and Salicylate-Mediated Signals in Plant Defense.  
807 *Plant Cell.* **16**:319–331.  
808 <http://www.plantcell.org/content/16/2/319>  
809 <http://www.ncbi.nlm.nih.gov/pubmed/14742872>  
810 [http://www.plantcell.o](http://www.plantcell.org/content/16/2/319.full)  
[rg/content/16/2/319.full.pdf](http://www.plantcell.org/content/16/2/319.full.pdf).
- 811 Luis, A. De, Markmann, K., Cognat, V., Holt, D.B., Charpentier, M., Parniske, M.,  
812 Stougaard, J. and Voinnet, O. (2012). Two microRNAs linked to nodule infection and  
813 nitrogen-fixing ability in the legume *Lotus japonicus*. *Plant Physiol.* **160**:2137–2154.  
814 <http://www.ncbi.nlm.nih.gov/pubmed/23071252>  
815 [http://www.ncbi.nlm.nih.gov/pmc/](http://www.ncbi.nlm.nih.gov/pmc/articles/PMC3510137/pdf/2137.pdf)  
[articles/PMC3510137/pdf/2137.pdf](http://www.ncbi.nlm.nih.gov/pmc/articles/PMC3510137/pdf/2137.pdf).
- 816 Mao, G., Turner, M., Yu, O. and Subramanian, S. (2013). miR393 and miR164 influence  
817 indeterminate but not determinate nodule development. *Plant Signal. Behav.* **8**:doi:  
818 10.4161/psb.26753. <http://www.ncbi.nlm.nih.gov/pubmed/24494229>.
- 819 Matys, V. et al. (2003). TRANSFAC®: Transcriptional regulation, from patterns to profiles.

- 820 Nucleic Acids Res. **31**:374–378.
- 821 Megraw, M. and Hatzigeorgiou, A.G. (2010). MicroRNA Promoter Analysis. In J. M.  
822 Walker, ed. *Plant MicroRNAs*. pp. 149–161.  
823 <http://www.springerlink.com/index/10.1007/978-1-60327-005-2>.
- 824 Meyers, B.C. et al. (2008). Criteria for annotation of plant MicroRNAs. *Plant Cell*. **20**:3186–  
825 3190.
- 826 Millar, A.A. and Gubler, F. (2005). The Arabidopsis GAMYB-Like Genes , MYB33 and  
827 MYB65 , Are MicroRNA-Regulated Genes That Redundantly Facilitate Anther  
828 Development. *Plant Cell*. **17**:705–721.  
829 [http://www.pubmedcentral.nih.gov/articlerender.fcgi?artid=1069693&tool=pmcentrez&](http://www.pubmedcentral.nih.gov/articlerender.fcgi?artid=1069693&tool=pmcentrez&rendertype=abstract)  
830 [endertype=abstract](http://www.pubmedcentral.nih.gov/articlerender.fcgi?artid=1069693&tool=pmcentrez&rendertype=abstract).
- 831 Moxon, S., Schwach, F., Dalmay, T., MacLean, D., Studholme, D.J. and Moulton, V. (2008).  
832 A toolkit for analysing large-scale plant small RNA datasets. *Bioinformatics*. **24**:2252–  
833 2253.
- 834 Navarro, L., Dunoyer, P., Jay, F., Arnold, B., Dharmasiri, N., Estelle, M., Voinnet, O. and  
835 Jones, J.D.G. (2005). Repressing Auxin Signaling. *Science* (80-. ).
- 836 Nawrocki, E.P. et al. (2015). Rfam 12.0: Updates to the RNA families database. *Nucleic*  
837 *Acids Res*. **43**:D130–D137.
- 838 Ouyang, S., Park, G., Atamian, H.S., Han, C.S., Stajich, J.E., Kaloshian, I. and Borkovich, K.  
839 a. (2014). MicroRNAs Suppress NB Domain Genes in Tomato That Confer Resistance  
840 to *Fusarium oxysporum*. *PLoS Pathog*. **10**..
- 841 Palatnik, J.F. et al. (2007). Sequence and Expression Differences Underlie Functional  
842 Specialization of Arabidopsis MicroRNAs miR159 and miR319. *Dev. Cell*. **13**:115–125.
- 843 Park, J.H. and Shin, C. (2015). The role of plant small RNAs in NB-LRR regulation. *Brief.*  
844 *Funct. Genomics*.1–7. <http://bfgp.oxfordjournals.org/cgi/doi/10.1093/bfgp/elv006>.
- 845 Peláez, P. and Sanchez, F. (2013). Small RNAs in plant defense responses during viral and  
846 bacterial interactions: similarities and differences. *Front. Plant Sci*. **4**:343.  
847 [http://www.pubmedcentral.nih.gov/articlerender.fcgi?artid=3763480&tool=pmcentrez&](http://www.pubmedcentral.nih.gov/articlerender.fcgi?artid=3763480&tool=pmcentrez&rendertype=abstract)  
848 [endertype=abstract](http://www.pubmedcentral.nih.gov/articlerender.fcgi?artid=3763480&tool=pmcentrez&rendertype=abstract).

- 849 Ramšak, Ž., Baebler, Š., Rotter, A., Korbar, M., Mozetič, I., Usadel, B. and Gruden, K.  
850 (2014). GoMapMan: Integration, consolidation and visualization of plant gene  
851 annotations within the MapMan ontology. *Nucleic Acids Res.* **42**:1167–1175.
- 852 Ravnikar, M. (2013). *Physiology of the Potato – Potato Virus Y Interaction*. 1–31.
- 853 Ritchie, M.E., Phipson, B., Wu, D., Hu, Y., Law, C.W., Shi, W. and Smyth, G.K. (2015).  
854 Limma powers differential expression analyses for RNA-sequencing and microarray  
855 studies. *Nucleic Acids Res.* **43**:e47.
- 856 Robinson, M.D., McCarthy, D.J. and Smyth, G.K. (2009). edgeR: A Bioconductor package  
857 for differential expression analysis of digital gene expression data. *Bioinformatics.*  
858 **26**:139–140.
- 859 Roossinck, M.J. (2015). Move Over, Bacteria! Viruses Make Their Mark as Mutualistic  
860 Microbial Symbionts. *J. Virol.* **89**:6532–6535.  
861 <http://jvi.asm.org/lookup/doi/10.1128/JVI.02974-14>.
- 862 Rotter, A., Usadel, B., Baebler, S., Stitt, M. and Gruden, K. (2007). Adaptation of the  
863 MapMan ontology to biotic stress responses: application in solanaceous species. *Plant*  
864 *Methods.* **3**:10. <http://www.plantmethods.com/content/3/1/10>.
- 865 Ruiz-Ferrer, V. and Voinnet, O. (2009). Roles of plant small RNAs in biotic stress responses.  
866 *Annu. Rev. Plant Biol.* **60**:485–510.
- 867 Sanz, L., Fernandez-Marcos, M., Modrego, A., Lewis, D.R., Muday, G.K., Pollmann, S.,  
868 Duenas, M., Santos-Buelga, C. and Lorenzo, O. (2014). Nitric Oxide Plays a Role in  
869 Stem Cell Niche Homeostasis through Its Interaction with Auxin(1 W OPEN ). *Plant*  
870 *Physiol.* **166**:1972-U1195.
- 871 Scholthof, K.B.G. et al. (2011). Top 10 plant viruses in molecular plant pathology. *Mol. Plant*  
872 *Pathol.* **12**:938–954.
- 873 Seo, J.-K., Wu, J., Lii, Y., Li, Y. and Jin, H. (2013). Contribution of small RNA pathway  
874 components in plant immunity. *Mol. Plant. Microbe. Interact.* **26**:617–25.  
875 [http://www.pubmedcentral.nih.gov/articlerender.fcgi?artid=3752434&tool=pmcentrez&](http://www.pubmedcentral.nih.gov/articlerender.fcgi?artid=3752434&tool=pmcentrez&rendertype=abstract)  
876 [rendertype=abstract](http://www.pubmedcentral.nih.gov/articlerender.fcgi?artid=3752434&tool=pmcentrez&rendertype=abstract).
- 877 Shannon, P., Markiel, A., Ozier, O., Baliga, N.S., Wang, J.T., Ramage, D., Amin, N.,  
878 Schwikowski, B. and Ideker, T. (2003). Cytoscape: A software Environment for

- 879 integrated models of biomolecular interaction networks. *Genome Res.* **13**:2498–2504.
- 880 Shivaprasad, P. V., Chen, H.-M., Patel, K., Bond, D.M., Santos, B. a. C.M. and Baulcombe,  
881 D.C. (2012). A MicroRNA Superfamily Regulates Nucleotide Binding Site-Leucine-  
882 Rich Repeats and Other mRNAs. *Plant Cell.* **24**:859–874.
- 883 Si-Ammour, a., Windels, D., Arn-Boulidoires, E., Kutter, C., Ailhas, J., Meins, F. and  
884 Vazquez, F. (2011). miR393 and Secondary siRNAs Regulate Expression of the  
885 TIR1/AFB2 Auxin Receptor Clade and Auxin-Related Development of Arabidopsis  
886 Leaves. *Plant Physiol.* **157**:683–691.
- 887 Singh, R.P., Valkonen, J.P.T., Gray, S.M., Boonham, N., Jones, R.A.C., Kerlan, C. and  
888 Schubert, J. (2008). Discussion paper: The naming of Potato virus Y strains infecting  
889 potato. *Arch. Virol.* **153**:1–13.
- 890 Solomon-Blackburn, R.M. and Barker, H. (2001). Breeding virus resistant potatoes (*Solanum*  
891 *tuberosum*): A review of traditional and molecular approaches. *Heredity (Edinb).* **86**:17–  
892 35.
- 893 Stare, T., Ramšak, Ž., Blejec, A., Stare, K., Turnšek, N., Weckwerth, W., Wienkoop, S.,  
894 Vodnik, D. and Gruden, K. (2015). Bimodal dynamics of primary metabolism-related  
895 responses in tolerant potato-Potato virus Y interaction. *BMC Genomics.* **16**:716.  
896 <http://www.biomedcentral.com/1471-2164/16/716>.
- 897 Subramanian, A. et al. (2005). Gene set enrichment analysis: a knowledge-based approach for  
898 interpreting genome-wide expression profiles. *Proc. Natl. Acad. Sci. U. S. A.*  
899 **102**:15545–50.
- 900 Usadel, B., Poree, F., Nagel, A., Lohse, M., Czedik-Eysenberg, A. and Stitt, M. (2009). A  
901 guide to using MapMan to visualize and compare Omics data in plants: A case study in  
902 the crop species, Maize. *Plant, Cell Environ.* **32**:1211–1229.
- 903 Varkonyi-Gasic, E., Wu, R., Wood, M., Walton, E.F. and Hellens, R.P. (2007). Protocol: a  
904 highly sensitive RT-PCR method for detection and quantification of microRNAs. *Plant*  
905 *Methods.* **3**:12.
- 906 Wang, D., Pajerowska-Mukhtar, K., Culler, A.H. and Dong, X. (2007). Salicylic Acid Inhibits  
907 Pathogen Growth in Plants through Repression of the Auxin Signaling Pathway. *Curr.*  
908 *Biol.* **17**:1784–1790.



- 909 Weiberg, A. and Jin, H. (2015). Small RNAs—the secret agents in the plant–pathogen  
910 interactions. *Curr. Opin. Plant Biol.* **26**:87–94.  
911 <http://linkinghub.elsevier.com/retrieve/pii/S1369526615000862>.
- 912 Westerhoff, H. V., Nakayama, S., Mondeel, T.D.G.A. and Barberis, M. (2015). Systems  
913 Pharmacology: An opinion on how to turn the impossible into grand challenges. *Drug*  
914 *Discov. Today Technol.* **15**:23–31.
- 915 Wilson, C. (2014). *Management of Virus Disease: Host Resistance* R. Cutts, ed., Wallingford,  
916 Oxfordshire, UK CABI.
- 917 Wu, L., Zhou, H., Zhang, Q., Zhang, J., Ni, F., Liu, C. and Qi, Y. (2010). DNA Methylation  
918 Mediated by a MicroRNA Pathway. *Mol. Cell.* **38**:465–475.  
919 <http://dx.doi.org/10.1016/j.molcel.2010.03.008>.
- 920 Xu, X. et al. (2011). Genome sequence and analysis of the tuber crop potato. *Nature.*  
921 **475**:189–195.
- 922 Yamaguchi, S. (2008). Gibberellin Metabolism and its Regulation. *Annu. Rev. Plant Biol.*  
923 **59**:225–251.  
924 <http://www.annualreviews.org/doi/10.1146/annurev.arplant.59.032607.092804>.
- 925 Yan, Z. et al. (2015). Identification of microRNAs and their mRNA targets during soybean  
926 nodule development: Functional analysis of the role of miR393j-3p in soybean  
927 nodulation. *New Phytol.* **207**:748–759.
- 928 Yang, D.L., Li, Q., Deng, Y.W., Lou, Y.G., Wang, M.Y., Zhou, G.X., Zhang, Y.Y. and He,  
929 Z.H. (2008). Altered disease development in the eui mutants and Eui overexpressors  
930 indicates that gibberellins negatively regulate rice basal disease resistance. *Mol. Plant.*  
931 **1**:528–537. <http://dx.doi.org/10.1093/mp/ssn021>.
- 932 Yang, L., Mu, X., Liu, C., Cai, J., Shi, K., Zhu, W. and Yang, Q. (2015). Overexpression of  
933 potato miR482e enhanced plant sensitivity to *Verticillium dahliae* infection. *J. Integr.*  
934 *Plant Biol.* **57**:1078–1088.
- 935 Yoshihama, M., Nakao, A. and Kenmochi, N. (2013). snOPY: a small nucleolar RNA  
936 orthological gene database. *BMC Res. Notes.* **6**:426.  
937 <http://www.biomedcentral.com/1756-0500/6/426>.
- 938 Yu, D., Fan, B., MacFarlane, S. a and Chen, Z. (2003). Analysis of the involvement of an

939 inducible Arabidopsis RNA-dependent RNA polymerase in antiviral defense. *Mol. Plant.*  
940 *Microbe. Interact.* **16**:206–216.

941 Zhang, C., Li, G., Zhu, S., Zhang, S. and Fang, J. (2014). tasiRNadb: a database of ta-siRNA  
942 regulatory pathways. *Bioinformatics.* **30**:1045–6.  
943 [https://academic.oup.com/bioinformatics/article-](https://academic.oup.com/bioinformatics/article-lookup/doi/10.1093/bioinformatics/btt746)  
944 [lookup/doi/10.1093/bioinformatics/btt746](https://academic.oup.com/bioinformatics/article-lookup/doi/10.1093/bioinformatics/btt746)[http://www.ncbi.nlm.nih.gov/pubmed/243](http://www.ncbi.nlm.nih.gov/pubmed/24371150)  
945 [71150](http://www.ncbi.nlm.nih.gov/pubmed/24371150).

946 Zhang, R., Marshall, D., Bryan, G.J. and Hornyik, C. (2013). Identification and  
947 Characterization of miRNA Transcriptome in Potato by High-Throughput Sequencing.  
948 *PLoS One.* **8**..

949 Zvereva, A.S. and Pooggin, M.M. (2012). Silencing and innate immunity in plant defense  
950 against viral and non-viral pathogens. *Viruses.* **4**:2578–2597.

951

## 952 **Figure legends**

953 **Figure 1. miR393-mediated cleavage of StTIR1 leads to production of phasiTIRs targeting**  
954 **diverse phytohormone signaling components.** Node shapes represent classes of sRNAs (triangle –  
955 miRNA; diamond – phasiRNA) or transcripts (circle). Node colors indicate components related to  
956 different hormone signaling pathways: green – jasmonic acid (JA); blue – auxin (AUX); magenta –  
957 brassinosteroid (BR); red – ethylene (ET). Arrows connect sRNAs and targets (blunt-end arrow) or  
958 *PHAS* loci and producing phasiRNAs (regular arrow). Node stu-miR393 represents miR393-5p and  
959 miR393-5p.1 and node StAFB1 represents StAFB1.1, StAFB1.2, and StAFB1.3. For details of the  
960 target transcripts/genes see **Supplemental Table 1**. StTIR1 – Transport inhibitor response 1,  
961 StLOX1 – Lipoxygenase 1, StERF2a – Ethylene responsive transcription factor 2a, StSAUR45 –  
962 Small auxin upregulated RNA 45, StAP2 – APETALA2, StOPR1 – 12-oxophytodienoate (OPDA)  
963 reductase, StDWF4 – Dwarf4, StARF1 – Auxin response factor 1, StEIN4 – Ethylene insensitive 4,  
964 StACD1 – 1-aminocyclopropane-1-carboxylic acid deaminase 1, StAFB1/2/3/5 – Auxin F-box  
965 1/2/3/5.

966 **Figure 2. PVY induced changes in sRNA regulatory network are controlling multiple immune**  
967 **and gibberellin signaling components in Désirée at the onset of viral multiplication. (A)**  
968 Visualization of differentially expressed miRNAs/phasiRNAs in PVY<sup>NTN</sup>-infected Désirée according  
969 to the function of their targets. Each square represents log<sub>2</sub> ratios of expression between PVY<sup>NTN</sup>- and  
970 mock-inoculated plants (red – upregulated; blue – downregulated). MapMan ontology bins: respiratory  
971 burst (20.1.1), redox state (21.6), MAPK (30.6), SA (17.8), JA (17.7), AUX (17.2), GA (17.6), BR  
972 (17.3), ET (17.5), CK (17.4), ABA (17.1), WRKY (27.3.32), NAC (27.3.27), GRAS (27.3.21), MYB  
973 (27.3.25), AP2/ERF (27.3.3), bHLH (27.3.6), PR-proteins (20.1.7), secondary metabolites (16), cell  
974 wall (10). The NBS-LRR and LRR-RLK bins were custom constructed for this study, based on their  
975 harboring domains (obtained from PFAM database; (Finn et al., 2016)). These bins represent  
976 differentially expressed miRNAs/phasiRNAs targeting NBS-LRRs or LRR-RLKs. NBS-LRR –  
977 nucleotide binding site-leucine-rich repeat protein, LRR-RLK – leucine-rich repeat receptor-like  
978 kinase, MAPK – mitogen activated protein kinase, SA – salicylic acid, JA – jasmonic acid, AUX –  
979 auxin, GA – gibberellin, BR – brassinosteroid, ET – ethylene, CK – cytokinin, ABA – abscisic acid,

980 PR – pathogenesis-related. **(B)** Network of differentially expressed endogenous sRNAs and vsiRNAs  
981 targeting mRNAs of GA biosynthesis and signaling pathways in Désirée 3 days post PVY<sup>NTN</sup>  
982 inoculation. Node shape represent classes of sRNAs (triangle – miRNA; diamond – phasiRNA;  
983 arrowhead – vsiRNA), transcripts (circle) or metabolites (rectangle). Statistical significances of  
984 expression differences (p-values) and direction of expression change are represented by the node  
985 colors (see the legend). Arrows indicate type of interaction (solid-line normal arrow – direct  
986 interaction; dashed-line normal arrow – indirect interaction; blunt-end solid arrow – cleavage observed  
987 by Degradome-Seq, blunt-end dashed-line arrow – *in silico* predicted cleavage (or translational  
988 repression as proposed by Rogers and Chen (Rogers and Chen, 2013), dashed-line oval arrow – *in*  
989 *silico* predicted translational repression). Node stu-miR319a represents stu-miR319a-3p, stu-miR319a-  
990 3p.2, stu-miR319a-3p.4 and stu-miR319b-3p. Node StGA20ox represents StGA20ox, StGA20ox1,  
991 StGA20ox3 and StGA20ox4. For details of the target transcripts/genes see **Supplemental Table 1**.  
992 Stu-miR167e – stu-miR167e-3p; stu-miR482f – miR482f-3p; stu-miR6022 – miR6022-3p; StGA1 –  
993 GA REQUIRING 1 (ent-copalyl diphosphate synthase); StGA20ox – GA20-oxidase; StGA3ox –  
994 GA3-oxidase; StGID1C – GA receptor - GA INSENSITIVE DWARF1C hydrolase; StSN1 – Snakin-  
995 1; StDELLA – DELLA protein; StLRR-RLK – leucine-rich repeat receptor-like protein kinase. **(C)**  
996 Changes in concentrations of a set of plants hormones in Désirée 3 days after PVY<sup>NTN</sup> infection.  
997 sRNA-mediated repression of GA biosynthesis was confirmed by reduced GA<sub>3</sub> levels in PVY-infected  
998 Désirée plants. Colors present as log<sub>2</sub> ratios of mean concentrations between PVY<sup>NTN</sup>- and mock-  
999 inoculated plants (n=4; red – increased, blue – decreased level). \* - indicate statistically significant  
1000 values (ANOVA; p < 0.05). SA – salicylic acid, JA – jasmonic acid, OPDA –12-oxophytodienoic  
1001 acid, ABA – abscisic acid, IAA – indole-3-acetic acid.

1002 **Figure 3. Numbers of unique and common differentially expressed miRNAs and phasiRNAs 3**  
1003 **days post PVY<sup>NTN</sup> inoculation in comparison of SA-deficient and nontransgenic Désirée plants.**  
1004 Venn diagrams show the number of differentially expressed (FDR corrected p-value < 0.05) **(A)**  
1005 miRNAs and **(B)** phasiRNAs in mock- or PVY<sup>NTN</sup>-inoculated potato leaves of cv. Désirée and NahG-  
1006 Désirée. Upregulated miRNAs/phasiRNAs are shown in bold and downregulated in normal text. D –  
1007 Désirée, NahG – NahG-Désirée, M – mock, P – PVY<sup>NTN</sup>.

1008 **Figure 4. sRNA response is attenuated in susceptible SA depleted plants following PVY<sup>NTN</sup>**  
1009 **infection.** **(A)** Visualization of differentially expressed miRNAs/phasiRNAs in PVY<sup>NTN</sup>-infected  
1010 NahG-Désirée according to the function of their targets. Each square represents log<sub>2</sub> ratios of  
1011 expression between PVY<sup>NTN</sup>- and mock-inoculated plants (red – upregulated; blue – downregulated).  
1012 **(B)** Network of endogenous sRNAs and vsiRNAs targeting mRNAs of GA biosynthesis and signaling  
1013 pathways in NahG-Désirée 3 days post PVY<sup>NTN</sup> inoculation. **(C)** Concentrations of a set of plants  
1014 hormones in NahG-Désirée 3 days after PVY<sup>NTN</sup> infection. The levels of all analyzed hormones  
1015 remained unchanged in NahG plants following PVY<sup>NTN</sup> infection. Colors present as log<sub>2</sub> ratios of  
1016 mean concentrations between PVY<sup>NTN</sup>- and mock-inoculated plants (n=4; red – increased, blue –  
1017 decreased level). \* - indicate statistically significant values (ANOVA; p < 0.05). For abbreviations  
1018 and other details of the scheme, see the caption of **Figure 2**.

1019 **Figure 5. sRNA regulatory network is intertwined with immunity- and gibberellin-related**  
1020 **signaling mediating trade-offs in development and defense.** Node color denotes component  
1021 type/function (grey – virus-derived; yellow – RNA silencing; blue – immune response; green –  
1022 plant development). Lines represent different types of interaction (solid line – protein level; dashed  
1023 – transcriptional/post-transcriptional level). Normal arrow – activation, blunt-end arrow –  
1024 inhibition, combination of normal arrow and blunt-end arrow – unknown mechanism of action. ? –  
1025 inferred from experiments performed in other species. vRNA – viral RNA; vsiRNA – virus-derived  
1026 siRNA; HcPro – helper component-proteinase; DCL – DICER-like protein; AGO1 – Argonaute 1;  
1027 RdRp – RNA-dependent RNA polymerase; NBS-LRR – nucleotide binding site-leucine-rich repeat  
1028 protein; LRR-RLK – leucine-rich repeat receptor-like kinase; Ca – calcium; MAPK – mitogen  
1029 activated protein kinase; SA – salicylic acid; GAMYB – GA-induced MYB-like protein; GA –  
1030 gibberellin; GA20ox – GA20-oxidase; GA3ox – GA3-oxidase.

1031

## 1032 **Table legends**

1033 **Table 1. SA-dependent transcriptional responses of potato leaves in cv. Désirée.**

1034

1035

## 1036 **Supplemental Online File legends**

1037 **Supplemental Online File 1. sRNA regulatory network connecting endogenous miRNAs with**  
1038 **phasiRNAs and their targets.** For each predicted interaction, miRNA/phasiRNA identifiers, the  
1039 target transcript identifiers, short gene name, full descriptions and MapMan ontology annotations  
1040 (GoMapMan; (Ramšak et al., 2014)) are shown. Additionally, *PHAS* loci and their producing  
1041 phasiRNAs are also included. Short names for potato genes were inferred from *Arabidopsis thaliana*  
1042 orthologs where applicable, else the StNIB\_v1 gene identifier was set (Ramšak et al., 2014). For each  
1043 sRNA-target interaction, interaction properties were also included (see **Supplemental Dataset 5 and**  
1044 **6**). Additionally, for each sRNA the log<sub>2</sub>FC and p-values among different comparisons are given and  
1045 the log<sub>2</sub>FC ratios of target transcripts between PVY<sup>NTN</sup> and mock inoculated Désirée or NahG-Désirée  
1046 plants (from the study of Stare et al. 2015). – statistically not significant (FDR p > 0.05); NA – not  
1047 analyzed or not available; NR – not relevant. D – Désirée; NahG – NahG-Désirée; M – mock; P –  
1048 PVY<sup>NTN</sup>.

1049

1050 **Supplemental Online File 2. sRNA regulatory network connecting miRNAs, phasiRNAs, PVY-**  
1051 **derived siRNAs (vsRNAs) and their targets.** For each predicted interaction, miRNA/phasiRNA  
1052 identifiers, the target transcript identifiers, short gene name, full descriptions and MapMan ontology  
1053 annotations (GoMapMan; Ramšak et al., 2014) are shown. Additionally, *PHAS* loci and their  
1054 producing phasiRNAs are also included. Short names for potato genes were inferred from *Arabidopsis*  
1055 *thaliana* orthologs where applicable, else the StNIB\_v1 gene identifier was set (Ramšak et al., 2014).  
1056 For each sRNA-target interaction, interaction properties were also included (see **Supplemental**  
1057 **Dataset 5, 6 and 8**). Additionally, for each sRNA the log<sub>2</sub>FC and p-values among different  
1058 comparisons are given and the log<sub>2</sub>FC ratios of target transcripts between PVY<sup>NTN</sup> and mock  
1059 inoculated Désirée or NahG-Désirée plants (from the study of Stare et al. 2015). – statistically not  
1060 significant (p > 0.05); NA – not analyzed or not available; NR – not relevant. D – Désirée; NahG –  
1061 NahG-Désirée; M – mock; P – PVY<sup>NTN</sup>.
